# Supplementary material
Source: PubMed Central journal article supplement (PMC1859936)
Supplement: pnas_0608138103_1.pdf [file pnas_0608138103_1.pdf]

| Patient | Start Date                                                | Stop Date  | ARV         |
|---------|-----------------------------------------------------------|------------|-------------|
| 1       | Jan-89                                                    | Jan-91     | AZT         |
| 1       | Jan-90                                                    | ?/95       | 3TC         |
| 1       | May-93                                                    | Nov-93     | D4T         |
| 1       | ?/95                                                      | Continuing | DDI         |
| 1       | ?/95                                                      | ?/97       | Ritonavir   |
| 1       | ?/96                                                      | ?/97       | Nelfinavir  |
| 1       | ?/97                                                      | ?/97       | Saquinavir  |
| 1       | ?/97                                                      | ?/98       | Delavirdine |
| 1       | Jan-98                                                    | Mar-98     | Abacavir    |
| 1       | Jan-98                                                    | Mar-98     | Efavirenz   |
| 1       | May-01                                                    | Continuing | Amprenavir  |
| 1       | May-01                                                    | 10-May-05  | Lopinavir   |
| 1       | May-01                                                    | Continuing | Tenofovir   |
| 1       | 10-May-05                                                 | Continuing | Tipranavir  |
| 1       | 10-May-05                                                 | Continuing | Norvir      |
| 1       | 10-May-05                                                 | Continuing | Fuzeon      |
| 1       | reason for failure: resistance <sup>1</sup> , intolerance |            |             |
| 1       | Dosed on July 21, 2003                                    |            |             |
| 2       | Apr-86                                                    | Jan-89     | AZT         |
| 2       | Jan-94                                                    | Dec-95     | DDC         |
| 2       | Jan-94                                                    | Jan-97     | Saquinavir  |
| 2       | Apr-96                                                    | Oct-96     | Crixivan    |
| 2       | Apr-96                                                    | Mar-99     | 3TC         |
| 2       | Apr-96                                                    | Mar-99     | D4T         |
| 2       | Jan-97                                                    | Aug-99     | Amprenavir  |
| 2       | Jan-97                                                    | Aug-99     | Norvir      |
| 2       | Nov-98                                                    | Mar-99     | DDI         |
| 2       | 4-Apr-98                                                  | 10-Oct-04  | Sustiva     |
| 2       | 19-Nov-01                                                 | Continuing | Kaletra     |
| 2       | 19-Nov-01                                                 | Continuing | Ziagen      |
| 2       | 13-Mar-03                                                 | 15-Jan-05  | 3TC         |
| 2       | 13-Mar-03                                                 | 15-Jan-05  | Viread      |
| 2       | Jan-05                                                    | Continuing | Truvada     |
| 2       | reason for failure: resistance <sup>1</sup> , intolerance |            |             |
| 2       | Dosed on October 13, 2003                                 |            |             |

| Patient | Start Date                                                | Stop Date  | ARV      |
|---------|-----------------------------------------------------------|------------|----------|
| 3       | Sep-92                                                    | Sep-92     | AZT      |
| 3       | Mar-95                                                    | Apr-95     | Viracept |
| 3       | Aug-96                                                    | Aug-96     | Zerit    |
| 3       | Jun-99                                                    | Jun-99     | Videx    |
| 3       | Sep-00                                                    | Sep-00     | Ziagen   |
| 3       | Nov-00                                                    | Nov-00     | Combivir |
| 3       | 27-Feb-02                                                 | 2-Jul-03   | Trizivir |
| 3       | 12-Nov-04                                                 | Continuing | Norvir   |
| 3       | 12-Nov-04                                                 | Continuing | Reyataz  |
| 3       | 12-Nov-04                                                 | Continuing | Truvada  |
| 3       | reason for failure: intolerance/non compliance            |            |          |
| 3       | Dosed on February 3, 2004                                 |            |          |
| 4       | Dec-97                                                    | Jan-98     | Viramune |
| 4       | Dec-97                                                    | Jul-99     | Videx    |
| 4       | Dec-97                                                    | Jul-99     | Zerit    |
| 4       | Jan-98                                                    | Jul-99     | Viracept |
| 4       | Aug-00                                                    | Continuing | Sustiva  |
| 4       | Aug-00                                                    | ?          | Videx    |
| 4       | Aug-00                                                    | ?          | Zerit    |
| 4       | Jan-05                                                    | Continuing | Truvada  |
| 4       | reason for failure: intolerance/non compliance            |            |          |
| 4       | Dosed on June 25, 2004                                    |            |          |
| 5       | Apr-96                                                    | 14-Nov-00  | 3TC      |
| 5       | Apr-96                                                    | 14-Nov-00  | D4T      |
| 5       | Apr-96                                                    | 14-Nov-00  | Crixivan |
| 5       | 12-Dec-00                                                 | 16-Aug-02  | Abacavir |
| 5       | 12-Dec-00                                                 | 16-Aug-02  | AZT      |
| 5       | 12-Dec-00                                                 | 16-Aug-02  | Sustiva  |
| 5       | 25-Feb-03                                                 | 8-Aug-03   | DDI      |
| 5       | Jan-02                                                    | Continuing | Viread   |
| 5       | Jan-02                                                    | Continuing | Kaletra  |
| 5       | Aug-03                                                    | Continuing | Abacavir |
| 5       | reason for failure: resistance <sup>1</sup> , intolerance |            |          |
| 5       | Dosed on September 27, 2004                               |            |          |

<sup>1</sup>-not genotyped
