# Supplementary material
Source: PubMed Central journal article supplement (PMC1859936)
Supplement: pnas_0608138103_6.pdf [file pnas_0608138103_6.pdf]

## Association of Various Genomic Features with VRX496 Integration Sites

### 1. Introduction

Here we examine the association of integration sites with various genomic features. The numbers of integration events analyzed are shown below:

| <u>Origin of data set</u> | <u># integrations</u> |
|---------------------------|-----------------------|
| HIVsum                    | 2969                  |
| VIRxSYS                   | 192                   |

The distribution of relative frequency of insertions across the chromosomes is given in the barplot below:

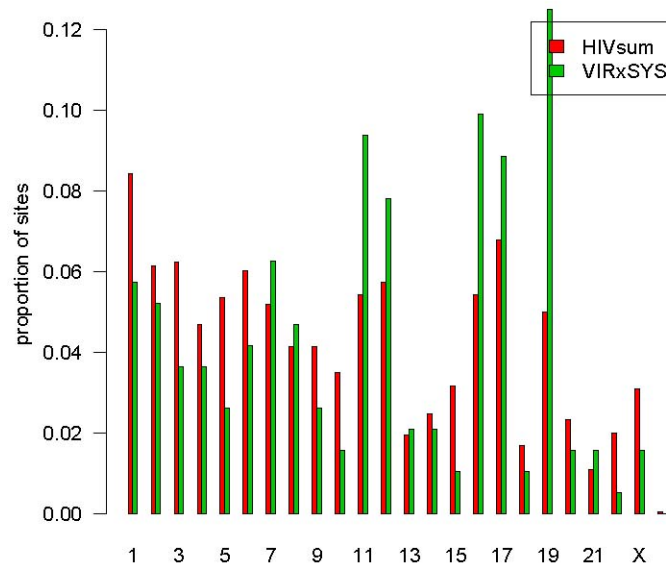

Are there chromosomes that are particularly favored for integration by one group over the other? This was tested for statistical significance. The test performed used the likelihood ratio statistic for the logistic regression model [reviewed in McCullagh et al (17)] as implemented by the glm function of R using the binomial family. The null hypothesis tested is the ratio of true integration events in the two groups is constant across all chromosomes. This test attains a p-value of 0.00136.

### 2. Preference for Genes

#### 2.1 Assembly Genes

Here we examine the relative preference that integration events in the two groups have for genes. In the following plot we show the relative frequency of integrations in genes according to the 'Acembly' annotation. The bars grouped over the label "In Gene" give the relative frequency of integration events (compared to control sites) between bases located within Acembly gene annotations, while the label "Not in Gene" give the relative frequency of integration events (compared to control sites) between bases not located within Acembly gene annotations.

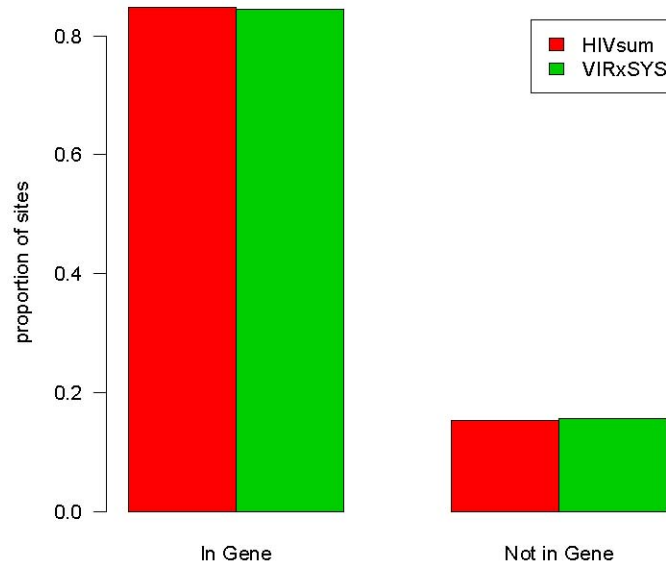

Is there a difference in the tendency for insertions to occur in genes? A formal test of significance yields a p-value of 0.901. In the following plot we show the relative frequency of insertions in exons according to the 'Acembly' annotation. The bars grouped over the label "In Exon" give the relative frequency of integration events (compared to control sites) between bases located in exons according to the Acembly annotation, while the label "Not in Exon" give the relative frequency of integration events (compared to control sites) between bases not located in exons according to the Acembly gene annotation.

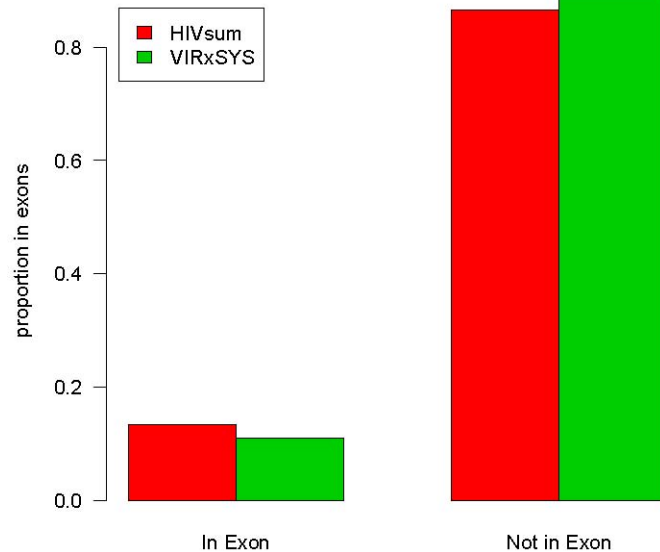

Here is the table of coefficients of the log ratio of intensities along with their standard errors, z statistics, and p-values:

|             | coef     | se    | z        | p        |
|-------------|----------|-------|----------|----------|
| (Intercept) | -2.72000 | 0.189 | -14.4000 | 4.31e-47 |
| in.gene     | 0.00838  | 0.208 | 0.0404   | 9.68e-01 |
| in.exon -   | 0.23600  | 0.240 | -0.9820  | 3.26e-01 |

The model on which these coefficients are based include terms for whether the site is in a gene or not. Thus, the effect shown as 'in.exon' is net of that due to being in a gene. Note that in the barplot above the 'Not in Exon' bars include the both introns and intergenic regions, so the impression given by the table may differ from that for the barplot.

## 2.2 refGenes

Here we examine the relative preference that insertions of the two types have for genes. In the following plot we show the relative frequency of insertions in genes according to the 'refGene' annotation.

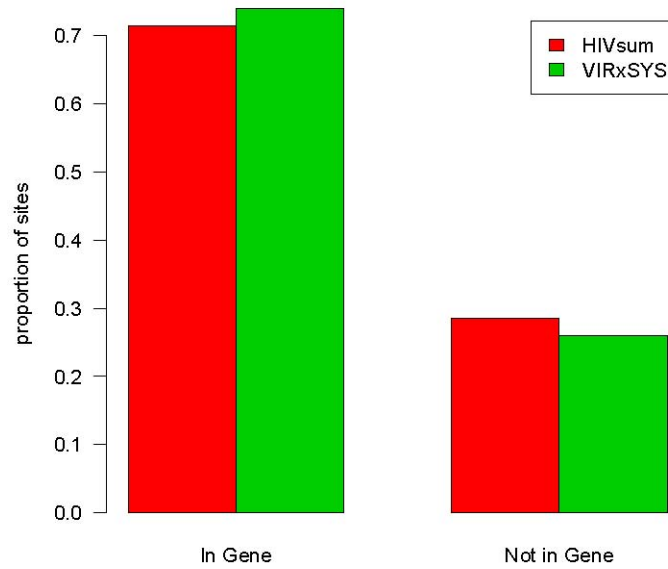

Is there is a tendency for insertions to occur in genes? A formal test of significance yields a p-value of 0.443.

In the following plot we show the relative frequency of insertions in exons according to the 'refGene' annotation.

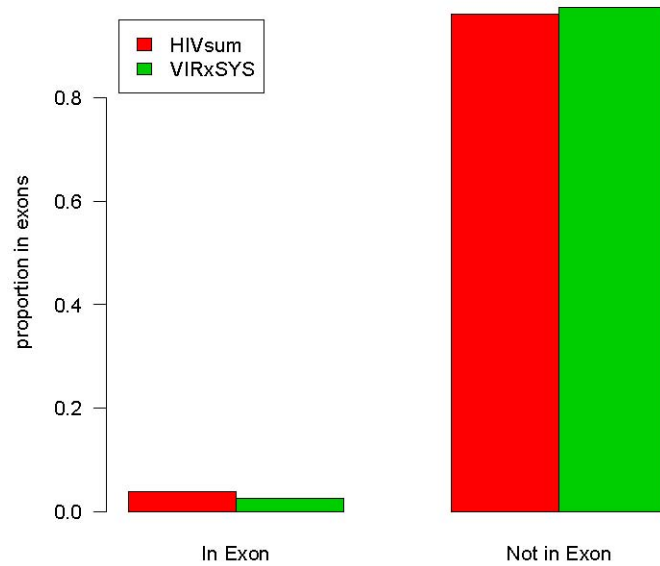

Here is the table of coefficients of the log ratio of intensities for along with their standard errors, z statistics, and p-values:

|             | coef   | se    | z      | p        |
|-------------|--------|-------|--------|----------|
| (Intercept) | -2.830 | 0.146 | -19.50 | 2.35e-84 |
| in.gene     | 0.149  | 0.170 | 0.873  | 3.83e-01 |
| in.exon     | -0.452 | 0.465 | -0.972 | 3.31e-01 |

The model on which these coefficients are based include terms for whether the site is in a gene or not. Thus, the effect shown as 'in.gene' is net of that due to being in a gene. Note that in the barplot above the 'Not in Exon' bars include the both introns and intergenic regions, so the impression given by the table may differ from that for the barplot.

## 2.3 genScan Genes

Here we examine the preference that insertions have for genes. In the following plot we show the relative frequency of insertions in genes according to the 'genScan annotation.

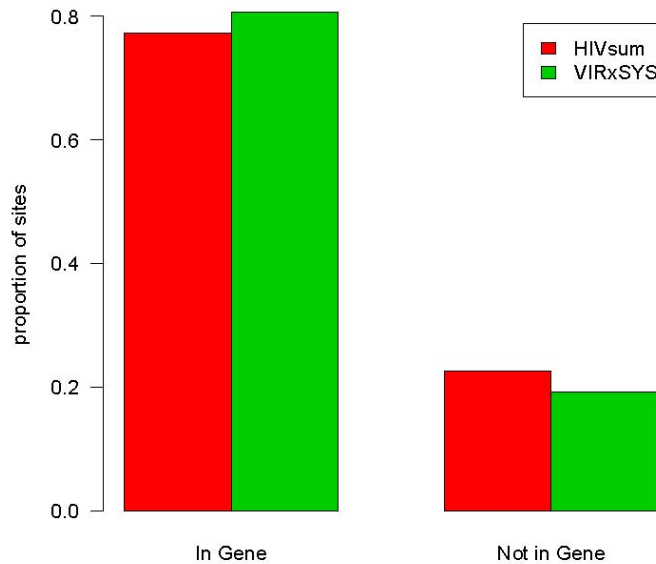

Is there is a tendency for insertions to occur in genes? A formal test of significance yields a p-value of 0.257.

In the following plot we show the relative frequency of insertions in exons according to the 'genScan' annotation.

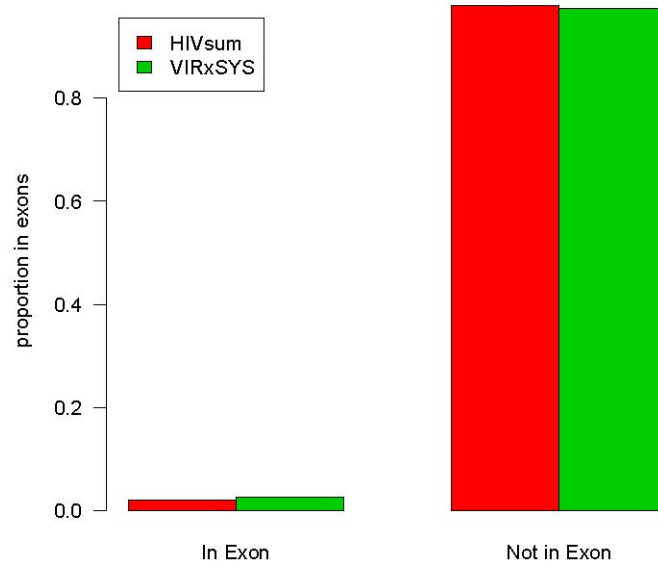

Here is the table of coefficients of the log ratio of intensities along with their standard errors, z statistics, and p-values:

|             | coef   | se    | z       | p        |
|-------------|--------|-------|---------|----------|
| (Intercept) | -2.900 | 0.169 | -17.200 | 2.72e-66 |
| in.gene     | 0.204  | 0.189 | 1.080   | 2.80e-01 |
| in.exon     | 0.182  | 0.472 | 0.386   | 7.00e-01 |

The model on which these coefficients are based include terms for whether the site is in a gene or not. Thus, the effect shown as 'in.exon' is net of that due to being in a gene. Note that in the barplot above the 'Not in Exon' bars include the both introns and intergenic regions, so the impression given by the table may differ from that for the barplot.

## 2.4 uniGenes

Here we examine the preference that insertions have for genes. In the following plot we show the relative frequency of insertions in genes according to the 'uniGene' annotation.

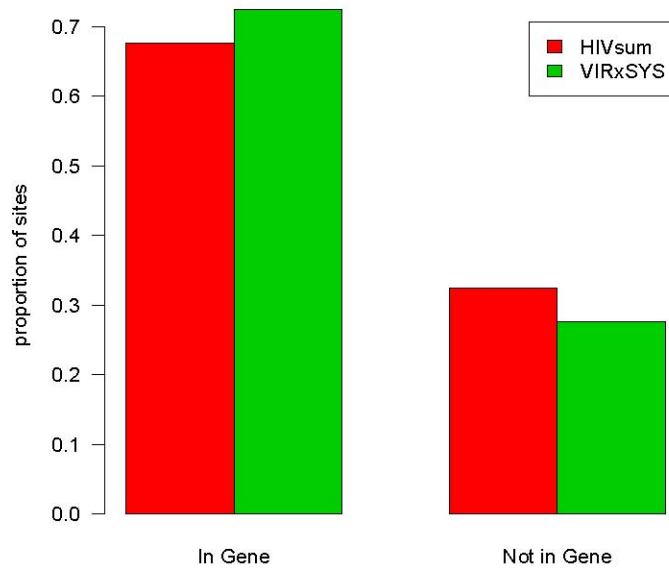

Is there is a tendency for insertions to occur in genes? A formal test of significance yields a p-value of 0.162.

In the following plot we show the relative frequency of insertions in exons according to the 'uniGene' annotation.

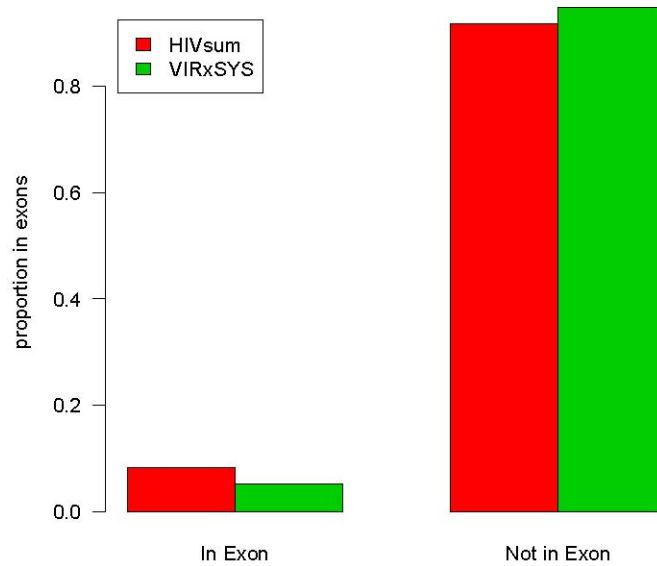

Here is the table of coefficients of the log ratio of intensities along with their standard errors, z statistics, and p-values:

|             | coef   | se    | z      | p        |
|-------------|--------|-------|--------|----------|
| (Intercept) | -2.900 | 0.141 | -20.50 | 8.46e-94 |
| in.gene     | 0.285  | 0.168 | 1.70   | 8.99e-02 |
| in.exon     | -0.589 | 0.335 | -1.76  | 7.89e-02 |

The model on which these coefficients are based include terms for whether the site is in a gene or not. Thus, the effect shown as 'in.exon' is net of that due to being in a gene. Note that in the barplot above the 'Not in Exon' bars include the both introns and intergenic regions, so the impression given by the table may differ from that for the barplot.

### 3 CpG Island Neighborhoods

Here we study the effect of being in the neighborhood of CpG Islands. Following Wu et al (11), who found that the neighborhoods within  $\pm 1$ kb of CpG islands are enriched for MLV insertions, we studied such neighborhoods for VRX496.

#### 3.1 1 kilobase neighborhoods

The following plot shows the effect of being in or within  $\pm 1$ kb of a CpG island:

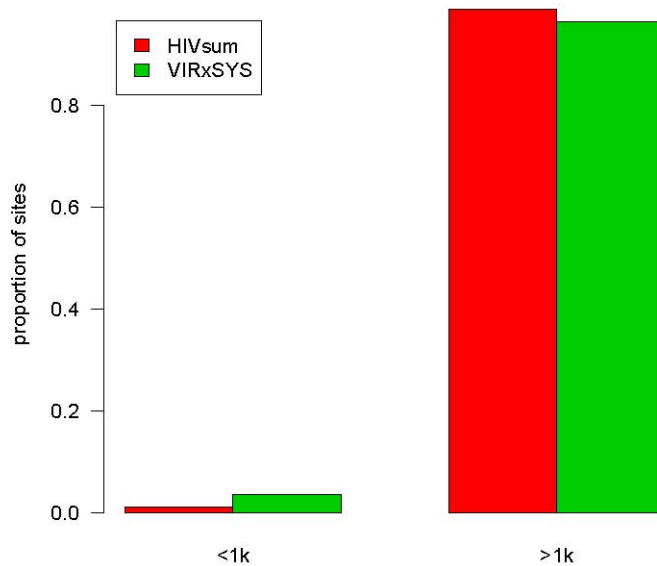

A formal test of significance comparing the difference attains a p-value of 0.0116.



### 3.2 5 kilobase neighborhoods

The following plot shows the effect of being in or within  $\pm 5$ kb of a CpG island:

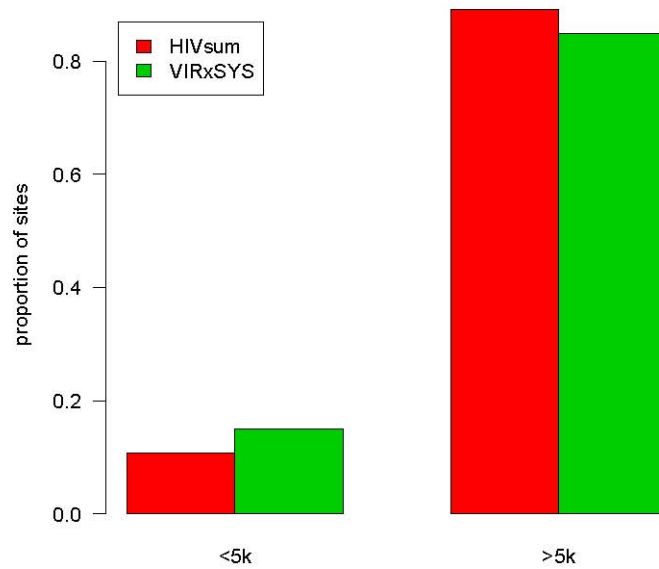

A formal test of significance comparing the difference attains a p-value of 0.0814.

### 3.3 10 kilobase neighborhoods

The following plot shows the effect of being in or within  $\pm 10$ kb of a CpG island:

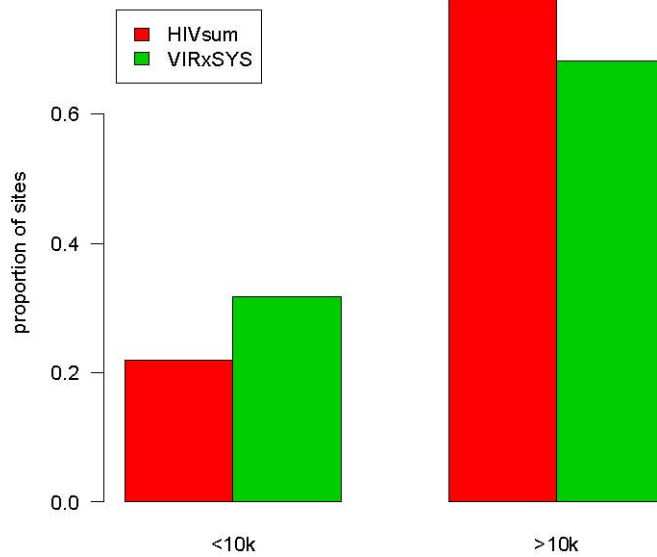

A formal test of significance comparing the difference attains a p-value of 0.00241.

### 3.4 25 kilobase neighborhoods

The following plot shows the effect of being in or within  $\pm 25$ kb of a CpG island:

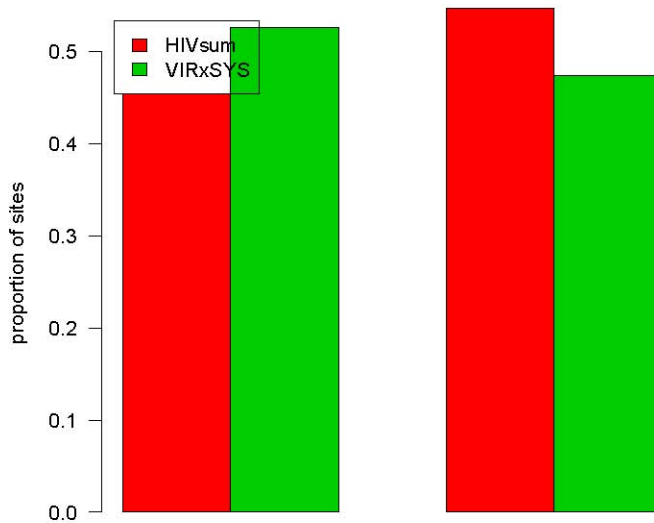

A formal test of significance comparing the difference attains a p-value of 0.051.

### 3.5 50 kilobase neighborhoods

The following plot shows the effect of being in or within  $\pm 50$ kb of a CpG island:

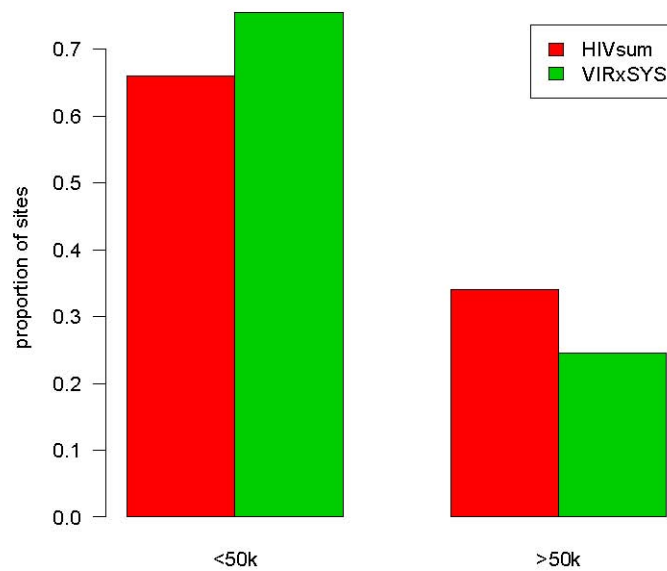

A formal test of significance comparing the difference attains a p-value of 0.0055.

#### 4 Gene Density, Expression 'Density', and CpG Island Density

In this section the association with gene density was examined. The 'genes' that are counted are the genes represented on the Affymetrix Hu133A microarray. In addition, we categorized the number of such genes expressed at various levels. The levels are

- low.ex            Count genes whose expression is in the upper half and divide by number of bases
- med.ex            Count genes whose expression is in the upper half  $1/8^{\text{th}}$  and divide by number of bases
- high.ex            Count genes whose expression is in the upper half  $1/16^{\text{th}}$  and divide by number of bases

The bolded terms are used as abbreviations in what follows. The abbreviation 'dens' is used to indicate gene density as number of genes per base.

##### 4.1 25 kiloBase Window

In the barplot that follows we examine the association of insertion sites with gene density in a 25 kilobase window surrounding each locus. More such plots will follow and the method of their construction is always to try to divide the data according to the deciles of density. However, it

often happens that there is a very skewed distribution of density and often even the 90<sup>th</sup> percentile is zero. In that case, the barplots simply show the sites for which the density is zero and those for which it is non-zero. If there are fewer than ten groups of bars, then the groupings contain ten percent of the sites each except for the leftmost grouping which will contain all of the remaining sites.

Also note that the title of the plot contains clues as to its content; the prefix indicates the type of variable studied while the suffix indicates the window width in the number of bases. The p-value given is the result of fitting a cubic polynomial to the gene density values.

| Category | limits         |         |
|----------|----------------|---------|
|          | lower category | upper   |
| 1        | 0e+00 group.1  | 0.00001 |
| 2        | 1e-05 group.2  | 0.00002 |
| 3        | 2e-05 group.3  | 0.00004 |
| 4        | 4e-05 group.4  | 0.00018 |

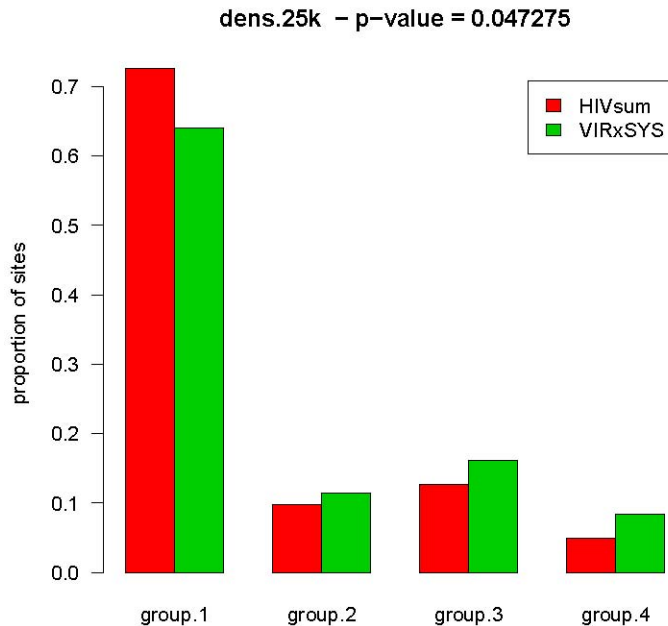

Here are the results for expression density. First, we count just genes that are in the upper half.

| Category | limits               |              |
|----------|----------------------|--------------|
|          | lower category       | upper        |
| 1        | 0.000000e+00 group.1 | 1.333333e-05 |
| 2        | 1.333333e-05 group.2 | 2.666667e-05 |
| 3        | 2.666667e-05 group.3 | 1.400000e-04 |

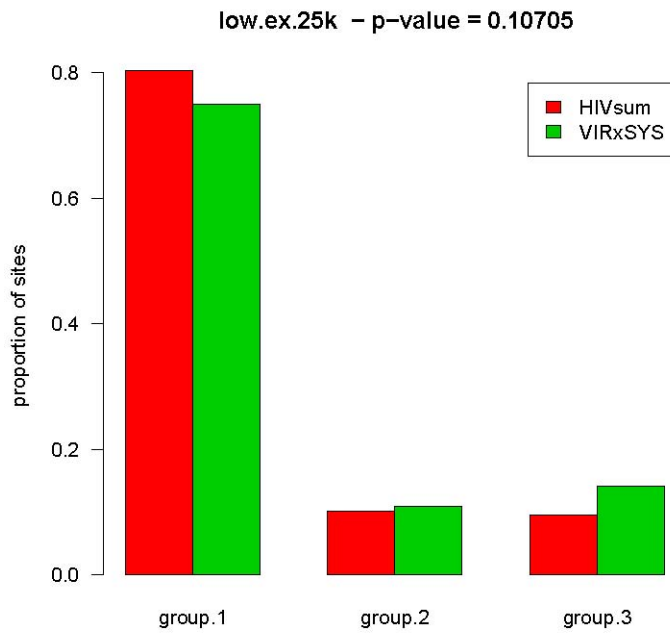

Now we count genes in the upper 1/8<sup>th</sup>:

| Category | limits               |              |
|----------|----------------------|--------------|
|          | lower category       | upper        |
| 1        | 0.000000e+00 group.1 | 1.333333e-05 |
| 2        | 1.333333e-05 group.2 | 1.200000e-04 |

med.ex.25k - p-value = 0.5715

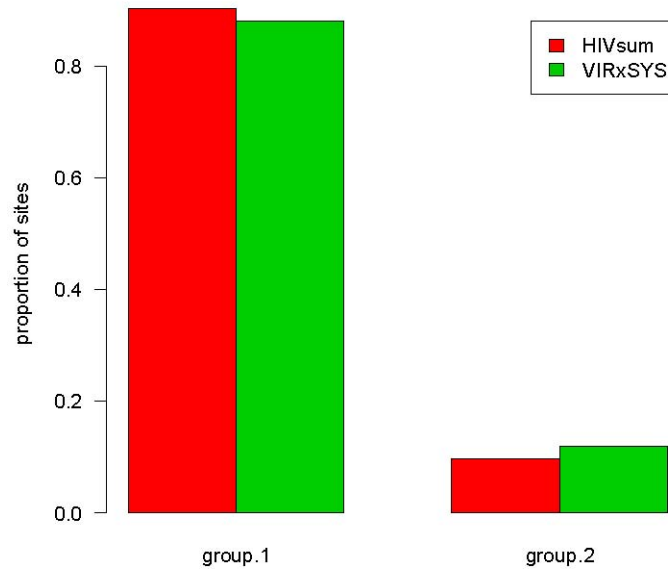

And here we count genes in the upper 1/16<sup>th</sup>:

| Category | limits               |                |
|----------|----------------------|----------------|
|          | lower category       | upper          |
| 0%       | 0.000000e+00 group.  | 1 3.636364e-06 |
| 100%     | 3.636364e-06 group.2 | 1.200000e-04   |

high.ex.25k - p-value = 0.40611

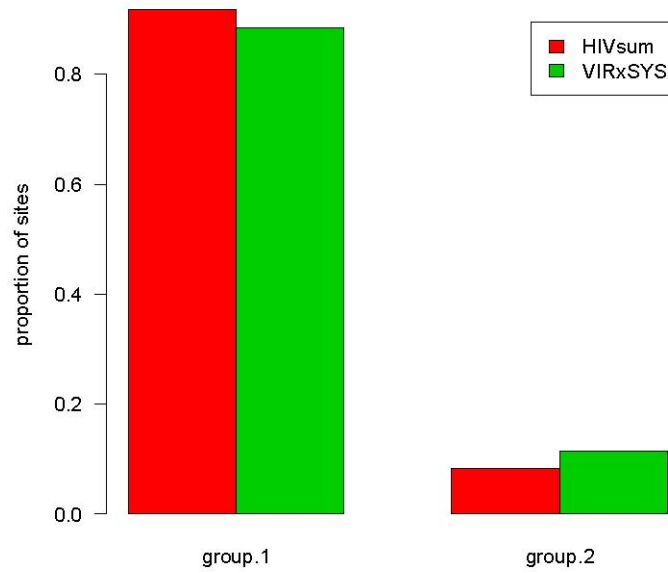

Here the effect of density of CpG islands is studied:

| Category | limits         |         |
|----------|----------------|---------|
|          | lower category | upper   |
| 1        | 0e+00 group.1  | 0.00002 |
| 2        | 2e-05 group.2  | 0.00004 |
| 3        | 4e-05 group.3  | 0.00024 |

cpg.dens.25k - p-value = 0.064298

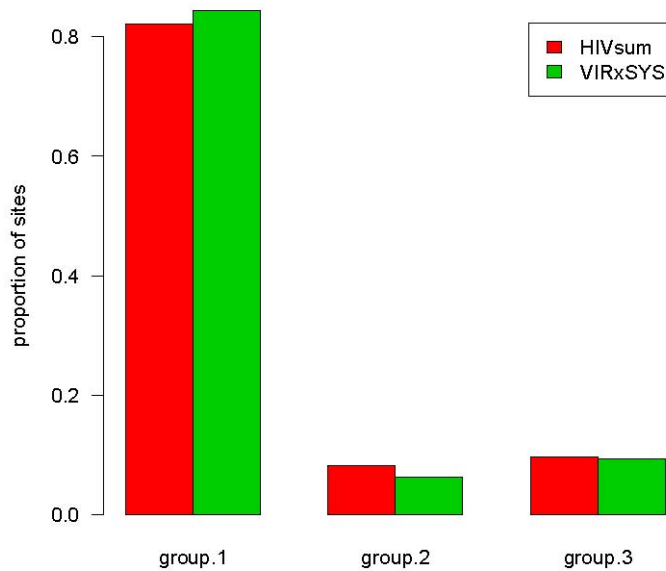

## 4.2 50 kiloBase Window

In the barplot that follows we examine the association of insertion sites with expression density in a 50 kilobase window surrounding each locus. First, we count just the number of genes on the represented on the chip.

| Category | limits               |                |
|----------|----------------------|----------------|
|          | lower category       | upper          |
| 1        | 0.000000e+00 group.1 | 1 6.666667e-06 |
| 2        | 6.666667e-06 group.2 | 1.000000e-05   |
| 3        | 1.000000e-05 group.3 | 2.000000e-05   |
| 4        | 2.000000e-05 group.4 | 3.000000e-05   |
| 5        | 3.000000e-05 group.5 | 1.400000e-04   |

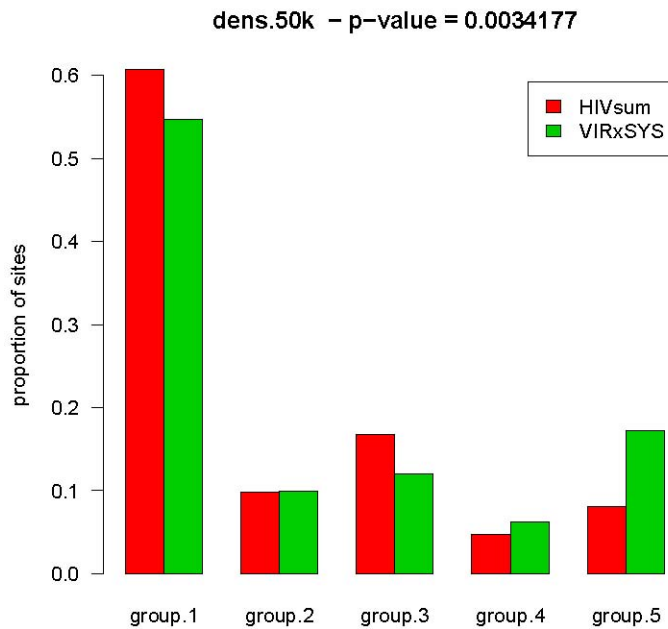

Below are the results for expression density. First, we count just genes that are in the upper half.

| Category | limits               |              |
|----------|----------------------|--------------|
|          | lower category       | upper        |
| 1        | 0.000000e+00 group.1 | 6.666667e-06 |
| 2        | 6.666667e-06 group.2 | 1.000000e-05 |
| 3        | 1.000000e-05 group.3 | 2.000000e-05 |
| 4        | 2.000000e-05 group.4 | 9.000000e-05 |



low.ex.50k - p-value = 0.0031678

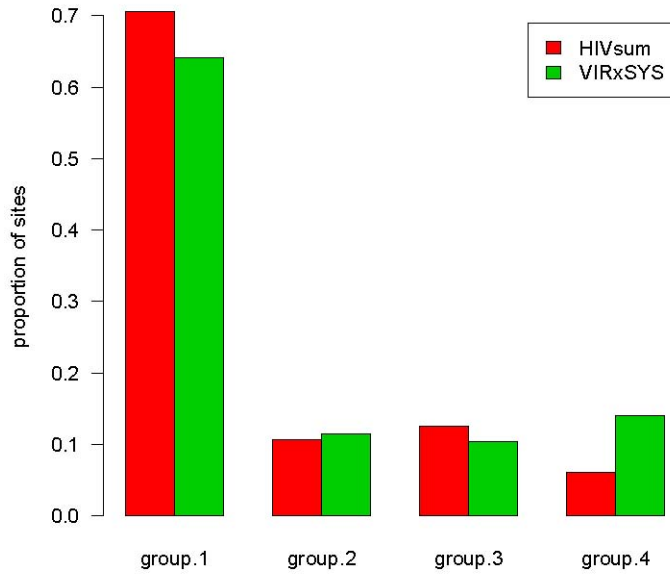

Now we count genes in the upper 1/8<sup>th</sup>:

| Category | limits               |              |
|----------|----------------------|--------------|
|          | lower category       | upper        |
| 1        | 0.000000e+00 group.1 | 5.000000e-06 |
| 2        | 5.000000e-06 group.2 | 1.166667e-05 |
| 3        | 1.166667e-05 group.3 | 8.000000e-05 |

med.ex.50k - p-value = 0.10863

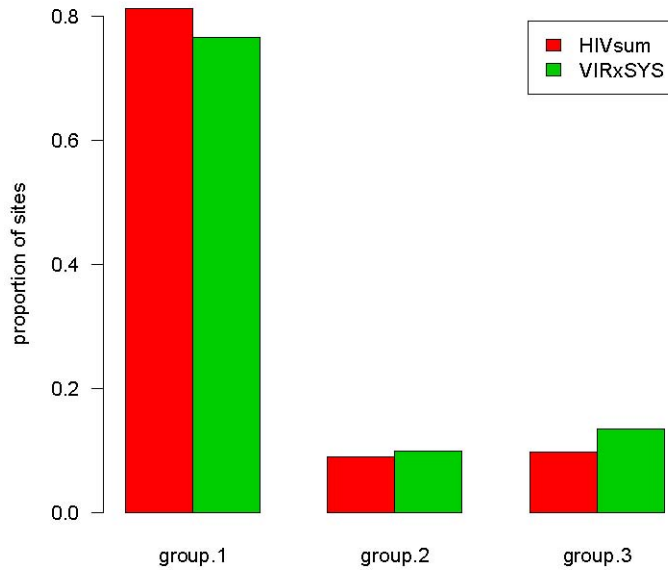

And here we count genes in the upper 1/16<sup>th</sup>:

| Category | limits               |             |
|----------|----------------------|-------------|
|          | lower category       | upper       |
| 1        | 0.000000e+00 group.1 | 6.66667e-06 |
| 2        | 6.66667e-06 group.2  | 8.00000e-05 |

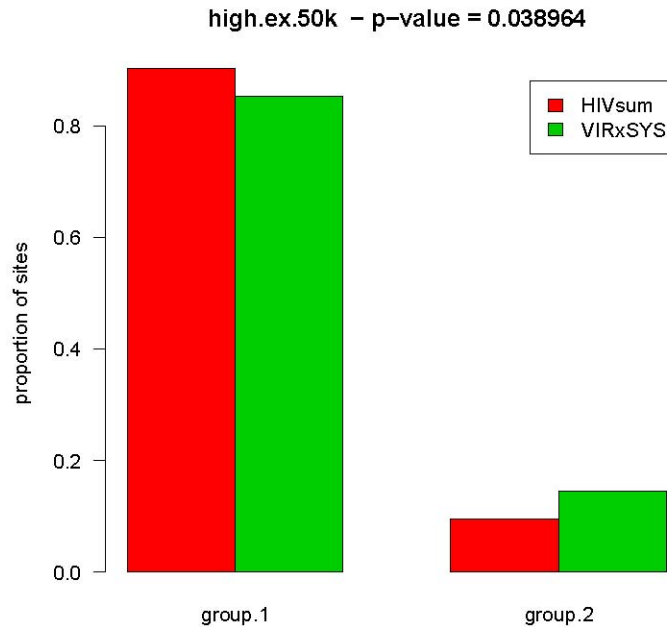

Below the effect of density of CpG islands is studied:

| Category | limits         |         |
|----------|----------------|---------|
|          | lower category | upper   |
| 1        | 0e+00 group.1  | 0.00001 |
| 2        | 1e-05 group.2  | 0.00002 |
| 3        | 2e-05 group.3  | 0.00003 |
| 4        | 3e-05 group.4  | 0.00005 |
| 5        | 5e-05 group.5  | 0.00025 |

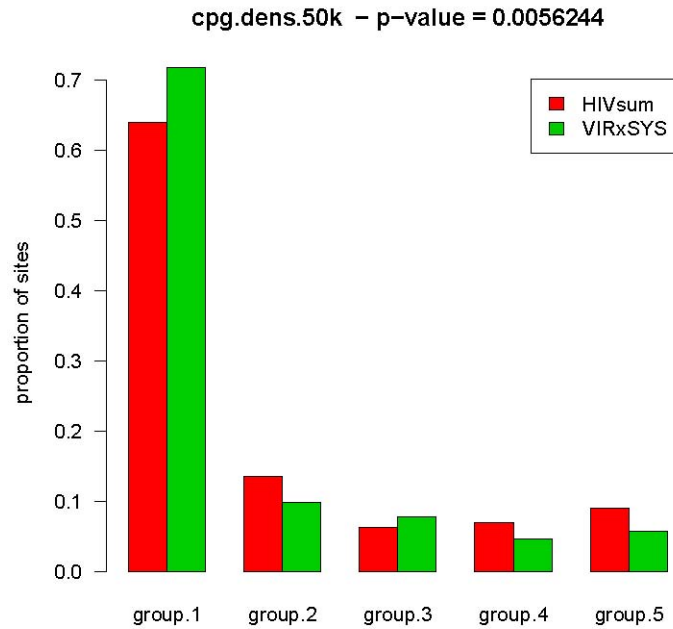

### 4.3 100 kiloBase Window

In the barplot that follows we examine the association of insertion sites with expression density in a 100 kilobase window surrounding each locus. First, we count just the number of genes on the represented on the chip.

| Category | limits               |              |
|----------|----------------------|--------------|
|          | lower category       | upper        |
| 1        | 0.000000e+00 group.1 | 3.333333e-06 |
| 2        | 3.333333e-06 group.2 | 5.000000e-06 |
| 3        | 5.000000e-06 group.3 | 1.000000e-05 |
| 4        | 1.000000e-05 group.4 | 1.600000e-05 |
| 5        | 1.600000e-05 group.5 | 2.500000e-05 |
| 6        | 2.500000e-05 group.6 | 1.050000e-04 |

dens.100k - p-value = 0.00090046

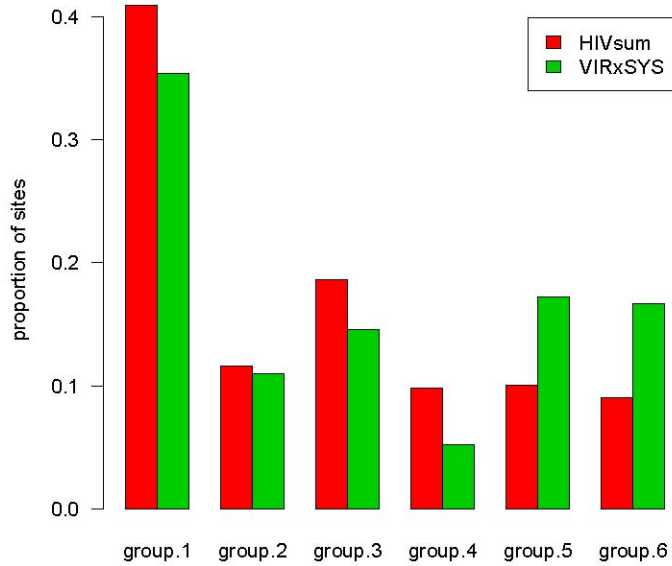

Here are the results for expression density. First, we count just genes that are in the upper half.

| Category | limits               |              |
|----------|----------------------|--------------|
|          | lower category       | upper        |
| 1        | 0.000000e+00 group.1 | 2.500000e-06 |
| 2        | 2.500000e-06 group.2 | 5.000000e-06 |
| 3        | 5.000000e-06 group.3 | 6.666667e-06 |
| 4        | 6.666667e-06 group.4 | 1.000000e-05 |
| 5        | 1.000000e-05 group.5 | 1.600000e-05 |
| 6        | 1.600000e-05 group.6 | 7.000000e-05 |

low.ex.100k - p-value = 0.0027716

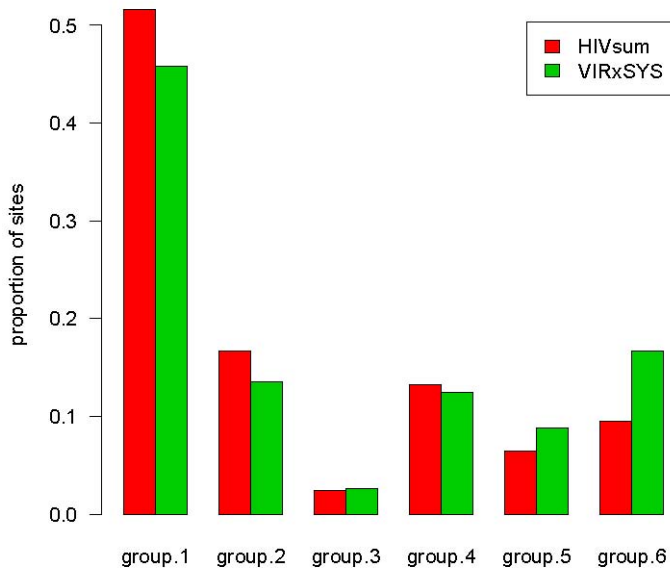

Now we count genes in the upper 1/8<sup>th</sup> :

| Category | limits               |              |
|----------|----------------------|--------------|
|          | lower category       | upper        |
| 1        | 0.000000e+00 group.1 | 3.333333e-06 |
| 2        | 3.333333e-06 group.2 | 5.000000e-06 |
| 3        | 5.000000e-06 group.3 | 1.000000e-05 |
| 4        | 1.000000e-05 group.4 | 5.500000e-05 |

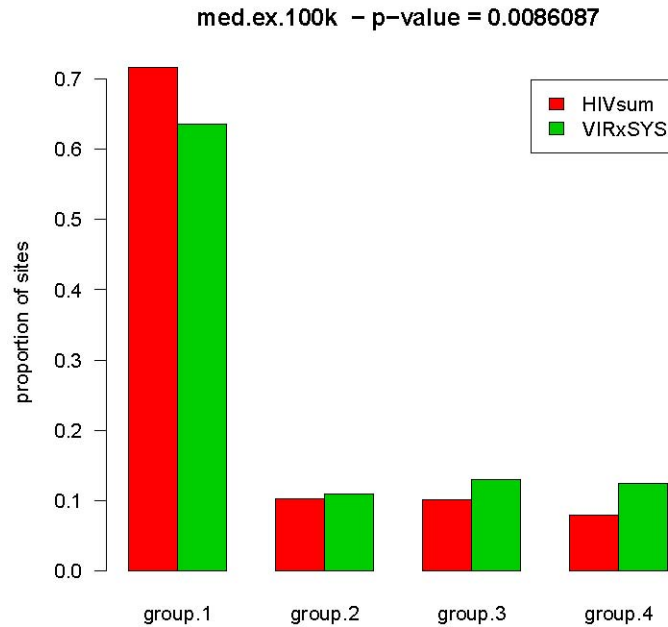

Below we count genes in the upper 1/16<sup>th</sup> :

| Category | limits               |              |
|----------|----------------------|--------------|
|          | lower category       | upper        |
| 1        | 0.000000e+00 group.1 | 1.666667e-06 |
| 2        | 1.666667e-06 group.2 | 5.000000e-06 |
| 3        | 5.000000e-06 group.3 | 4.000000e-05 |

high.ex.100k - p-value = 0.026039

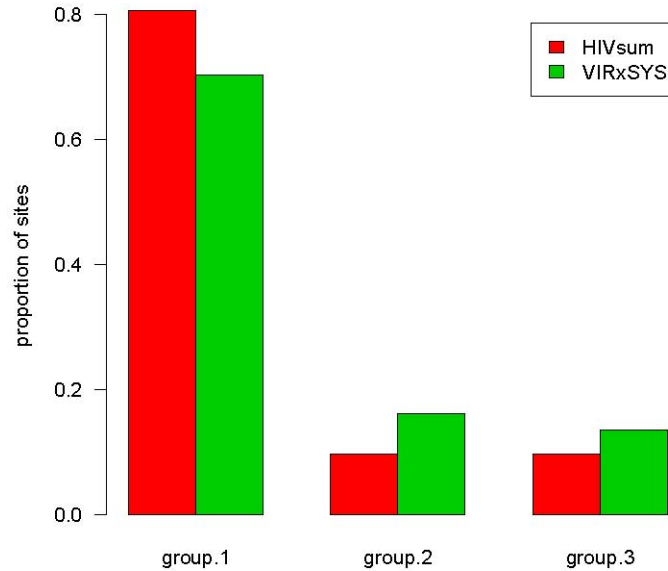

Here the effect of density of CpG islands is studied:

| Category | limits          |          |
|----------|-----------------|----------|
|          | lower category  | upper    |
| 1        | 0.0e+00 group.1 | 0.000005 |
| 2        | 5.0e-06 group.2 | 0.000010 |
| 3        | 1.0e-05 group.3 | 0.000015 |
| 4        | 1.5e-05 group.4 | 0.000020 |
| 5        | 2.0e-05 group.5 | 0.000030 |
| 6        | 3.0e-05 group.6 | 0.000055 |
| 7        | 5.5e-05 group.7 | 0.000215 |

cpg.dens.100k - p-value = 0.0039976

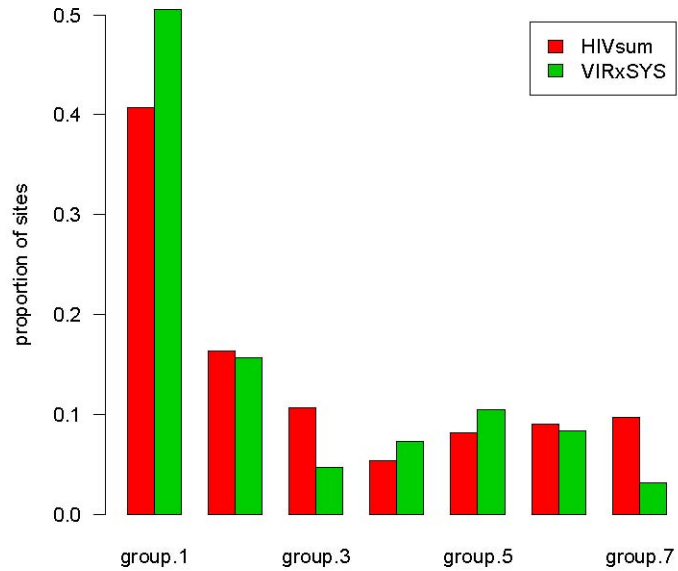

#### 4.4 250 kiloBase Window

In the barplot that follows we examine the association of insertion sites with expression density in a 250 kilobase window surrounding each locus. First, we count just the number of genes on the represented on the chip.

| Category | limits               |              |
|----------|----------------------|--------------|
|          | lower category       | upper        |
| 1        | 0.000000e+00 group.1 | 1.142857e-06 |
| 2        | 1.142857e-06 group.2 | 2.666667e-06 |
| 3        | 2.666667e-06 group.3 | 4.000000e-06 |
| 4        | 4.000000e-06 group.4 | 5.674768e-06 |
| 5        | 5.674768e-06 group.5 | 8.000000e-06 |
| 6        | 8.000000e-06 group.6 | 1.033333e-05 |
| 7        | 1.033333e-05 group.7 | 1.520000e-05 |
| 8        | 1.520000e-05 group.8 | 2.466667e-05 |
| 9        | 2.466667e-05 group.9 | 9.546667e-05 |

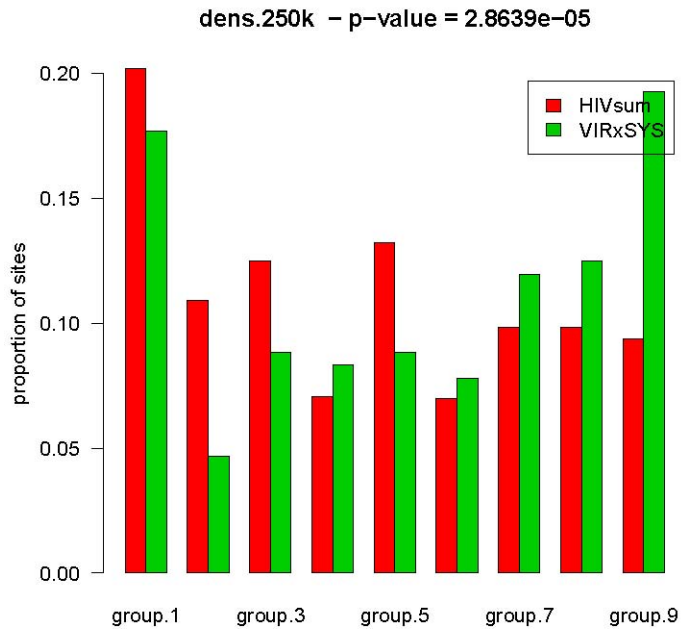

Here are the results for expression density. First, we count just genes that are in the upper half.

| Category | limits               |              |
|----------|----------------------|--------------|
|          | lower category       | upper        |
| 1        | 0.000000e+00 group.1 | 8.000000e-07 |
| 2        | 8.000000e-07 group.2 | 2.000000e-06 |
| 3        | 2.000000e-06 group.3 | 2.666667e-06 |
| 4        | 2.666667e-06 group.4 | 4.000000e-06 |
| 5        | 4.000000e-06 group.5 | 6.000000e-06 |
| 6        | 6.000000e-06 group.6 | 9.000000e-06 |
| 7        | 9.000000e-06 group.7 | 1.440000e-05 |
| 8        | 1.440000e-05 group.8 | 6.000000e-05 |



low.ex.250k - p-value = 2.7501e-05

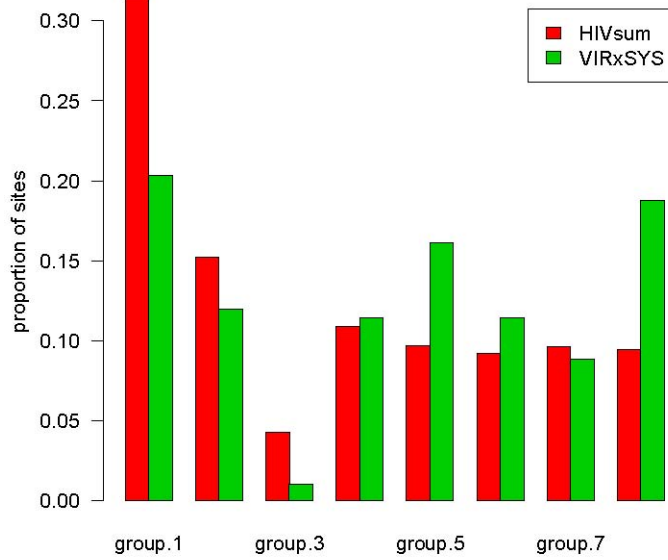

Now we count genes in the upper 1/8<sup>th</sup> :

| Category | limits               |              |
|----------|----------------------|--------------|
|          | lower category       | upper        |
| 1        | 0.000000e+00 group.1 | 1.000000e-06 |
| 2        | 1.000000e-06 group.2 | 2.000000e-06 |
| 3        | 2.000000e-06 group.3 | 3.333333e-06 |
| 4        | 3.333333e-06 group.4 | 4.800000e-06 |
| 5        | 4.800000e-06 group.5 | 8.000000e-06 |
| 6        | 8.000000e-06 group.6 | 3.033333e-05 |

med.ex.250k - p-value = 1.9116e-06

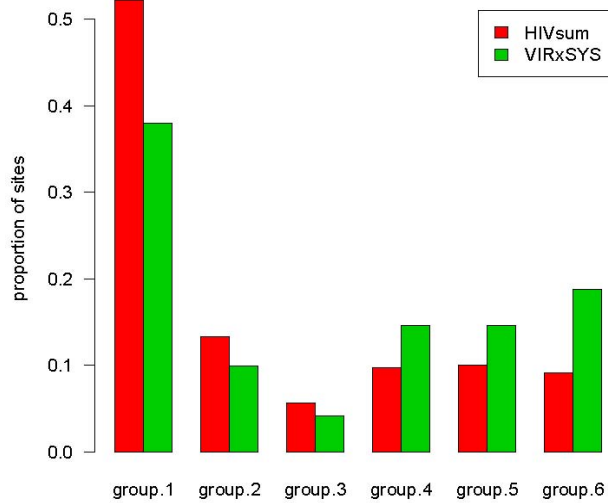

And here we count genes in the upper 1/16<sup>th</sup>:

| Category | limits               |              |
|----------|----------------------|--------------|
|          | lower category       | upper        |
| 1        | 0.000000e+00 group.1 | 1.333333e-06 |
| 2        | 1.333333e-06 group.2 | 2.666667e-06 |
| 3        | 2.666667e-06 group.3 | 4.000000e-06 |
| 4        | 4.000000e-06 group.4 | 2.400000e-05 |

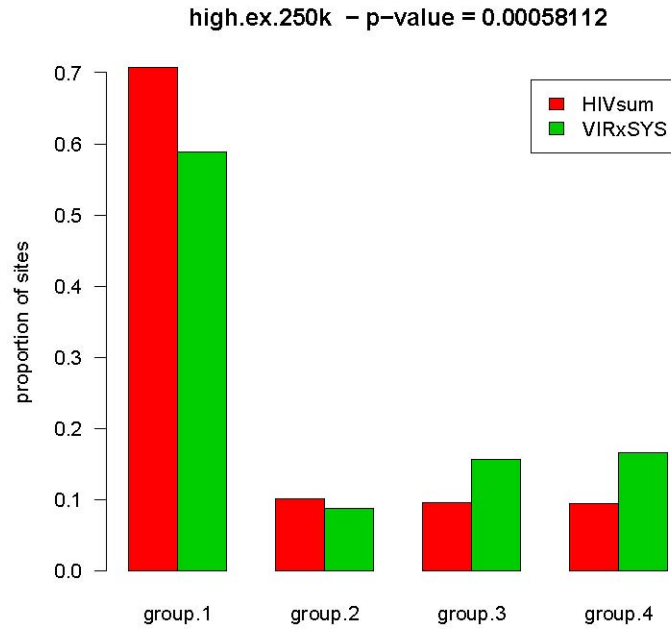

Here the effect of density of CpG islands is studied:

| Category | limits           |          |
|----------|------------------|----------|
|          | lower category   | upper    |
| 1        | 0.0e+00 group.1  | 0.000002 |
| 2        | 2.0e-06 group.2  | 0.000004 |
| 3        | 4.0e-06 group.3  | 0.000006 |
| 4        | 6.0e-06 group.4  | 0.000008 |
| 5        | 8.0e-06 group.5  | 0.000010 |
| 6        | 1.0e-05 group.6  | 0.000014 |
| 7        | 1.4e-05 group.7  | 0.000020 |
| 8        | 2.0e-05 group.8  | 0.000030 |
| 9        | 3.0e-05 group.9  | 0.000054 |
| 10       | 5.4e-05 group.10 | 0.000202 |

cpg.dens.250k - p-value = 0.0018328

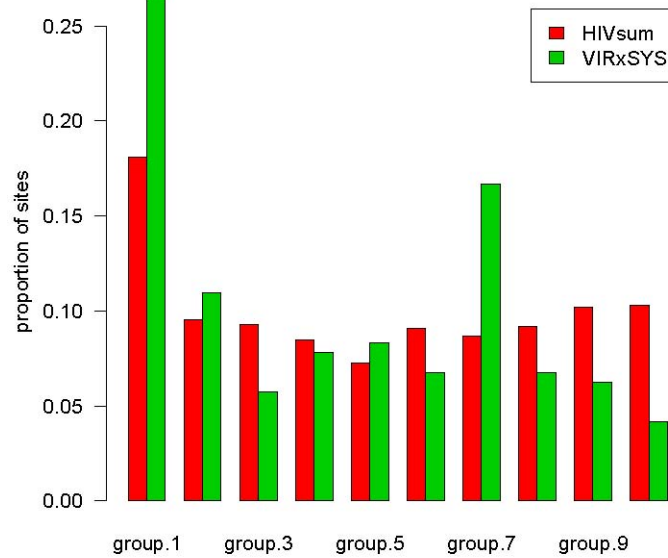

#### 4.5 500 kiloBase Window

In the barplot that follows we examine the association of insertion sites with expression density in a 500 kilobase window surrounding each locus. First, we count just the number of genes on the represented on the chip.

| Category | limits                |              |
|----------|-----------------------|--------------|
|          | lower category        | upper        |
| 1        | 0.000000e+00 group.1  | 5.000000e-07 |
| 2        | 5.000000e-07 group.2  | 2.000000e-06 |
| 3        | 2.000000e-06 group.3  | 3.000000e-06 |
| 4        | 3.000000e-06 group.4  | 4.000000e-06 |
| 5        | 4.000000e-06 group.5  | 5.400000e-06 |
| 6        | 5.400000e-06 group.6  | 7.333333e-06 |
| 7        | 7.333333e-06 group.7  | 1.000000e-05 |
| 8        | 1.000000e-05 group.8  | 1.500000e-05 |
| 9        | 1.500000e-05 group.9  | 2.300000e-05 |
| 10       | 2.300000e-05 group.10 | 7.633333e-05 |

dens.500k - p-value = 1.3014e-06

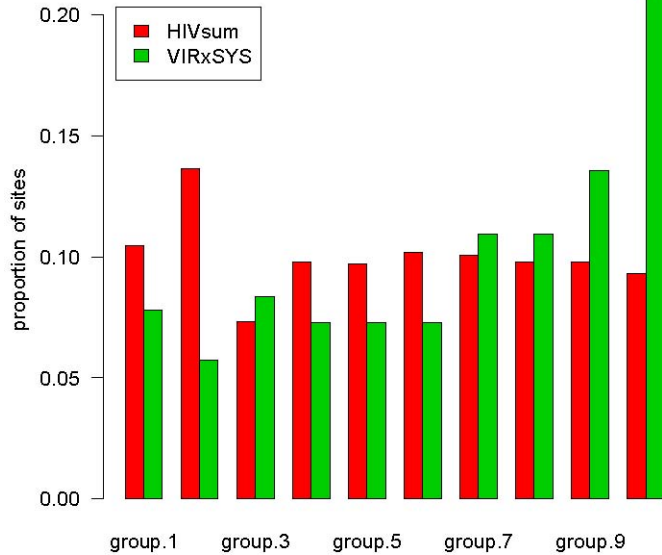

Below are the results for expression density. First, we count just genes that are in the upper half.

| Category | limits               |              |
|----------|----------------------|--------------|
|          | lower category       | upper        |
| 1        | 0.000000e+00 group.1 | 5.000000e-07 |
| 2        | 5.000000e-07 group.2 | 1.000000e-06 |
| 3        | 1.000000e-06 group.3 | 2.000000e-06 |
| 4        | 2.000000e-06 group.4 | 2.800000e-06 |
| 5        | 2.800000e-06 group.5 | 4.000000e-06 |
| 6        | 4.000000e-06 group.6 | 5.666667e-06 |
| 7        | 5.666667e-06 group.7 | 8.400000e-06 |
| 8        | 8.400000e-06 group.8 | 1.300000e-05 |
| 9        | 1.300000e-05 group.9 | 5.366667e-05 |

low.ex.500k - p-value = 3.4252e-07

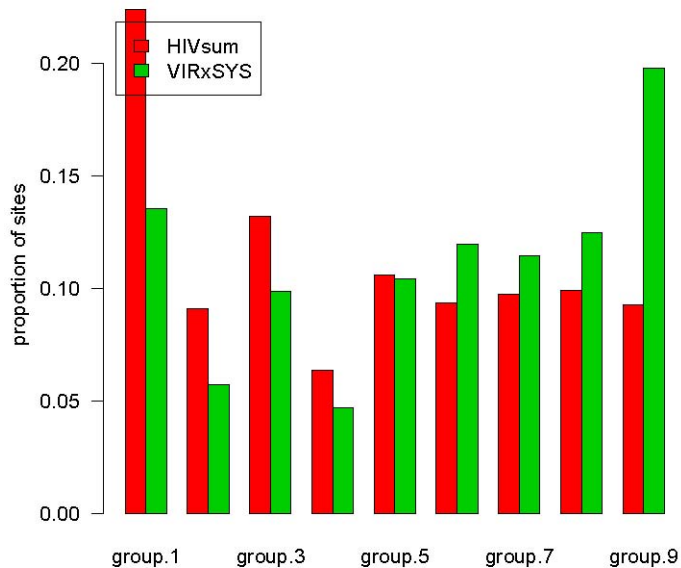

Now we count genes in the upper 1/8<sup>th</sup> :

| Category | limits               |              |
|----------|----------------------|--------------|
|          | lower category       | upper        |
| 1        | 0.000000e+00 group.1 | 6.666667e-07 |
| 2        | 6.666667e-07 group.2 | 1.222222e-06 |
| 3        | 1.222222e-06 group.3 | 2.000000e-06 |
| 4        | 2.000000e-06 group.4 | 3.000000e-06 |
| 5        | 3.000000e-06 group.5 | 4.285714e-06 |
| 6        | 4.285714e-06 group.6 | 7.166667e-06 |
| 7        | 7.166667e-06 group.7 | 2.383333e-05 |

med.ex.500k - p-value = 7.3128e-07

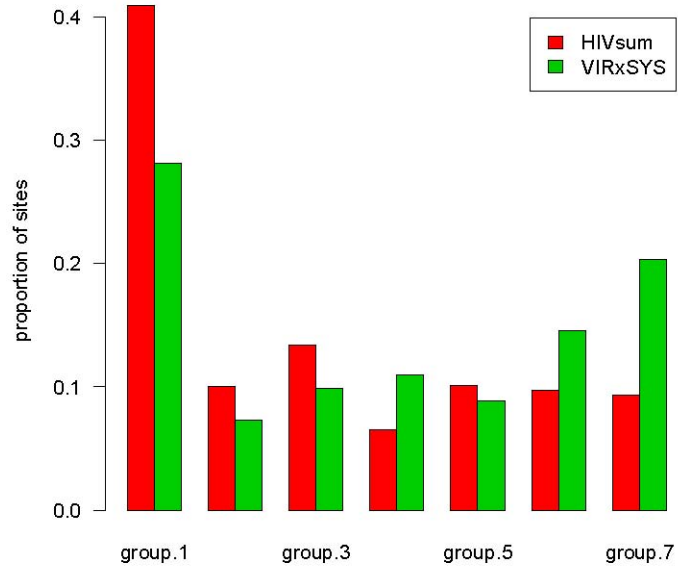

Here we count genes in the upper 1/16<sup>th</sup>:

| Category | limits               |              |
|----------|----------------------|--------------|
|          | lower category       | upper        |
| 1        | 0.000000e+00 group.1 | 3.333333e-07 |
| 2        | 3.333333e-07 group.2 | 8.000000e-07 |
| 3        | 8.000000e-07 group.3 | 1.333333e-06 |
| 4        | 1.333333e-06 group.4 | 2.000000e-06 |
| 5        | 2.000000e-06 group.5 | 4.000000e-06 |
| 6        | 4.000000e-06 group.6 | 1.500000e-05 |

high.ex.500k - p-value = 5.3174e-05

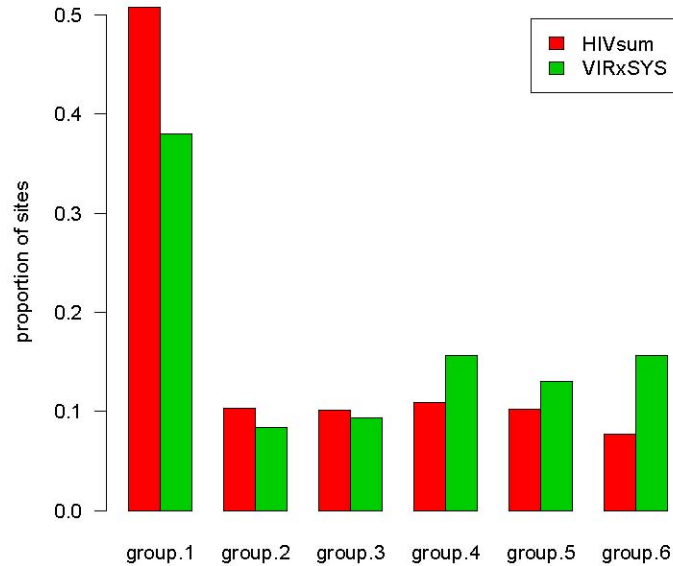

Here the effect of density of CpG islands is studied:

| Category | limits           |          |
|----------|------------------|----------|
|          | lower category   | upper    |
| 1        | 0.0e+00 group.1  | 0.000002 |
| 2        | 2.0e-06 group.2  | 0.000004 |
| 3        | 4.0e-06 group.3  | 0.000005 |
| 4        | 5.0e-06 group.4  | 0.000008 |
| 5        | 8.0e-06 group.5  | 0.000010 |
| 6        | 1.0e-05 group.6  | 0.000014 |
| 7        | 1.4e-05 group.7  | 0.000020 |
| 8        | 2.0e-05 group.8  | 0.000031 |
| 9        | 3.1e-05 group.9  | 0.000052 |
| 10       | 5.2e-05 group.10 | 0.000192 |





dens.1M - p-value = 3.6599e-07

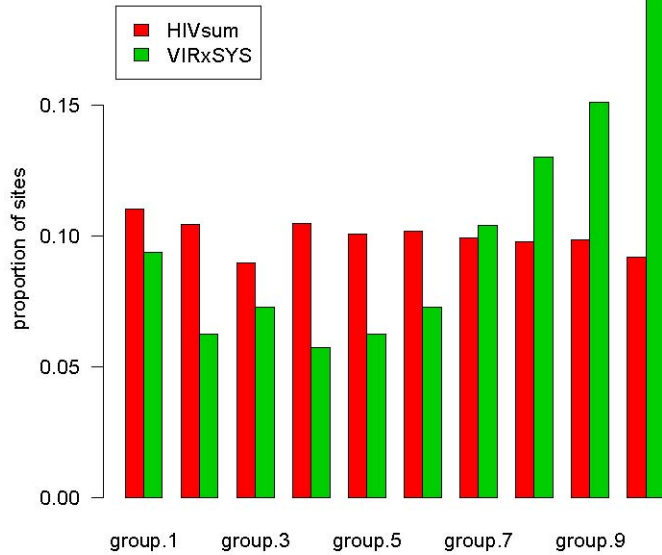

Here are the results for expression density. First, we count just genes that are in the upper half.

| Category | limits                |              |
|----------|-----------------------|--------------|
|          | lower category        | upper        |
| 1        | 0.000000e+00 group.1  | 1.428571e-07 |
| 2        | 1.428571e-07 group.2  | 6.666667e-07 |
| 3        | 6.666667e-07 group.3  | 1.166667e-06 |
| 4        | 1.166667e-06 group.4  | 1.750000e-06 |
| 5        | 1.750000e-06 group.5  | 2.500000e-06 |
| 6        | 2.500000e-06 group.6  | 3.583333e-06 |
| 7        | 3.583333e-06 group.7  | 5.000000e-06 |
| 8        | 5.000000e-06 group.8  | 7.642857e-06 |
| 9        | 7.642857e-06 group.9  | 1.217691e-05 |
| 10       | 1.217691e-05 group.10 | 4.058333e-05 |

low.ex.1M - p-value = 3.847e-08

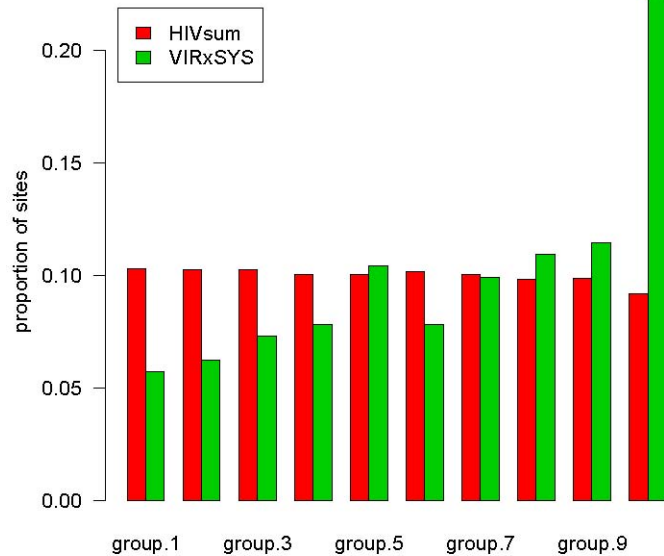

Now we count genes in the upper 1/8<sup>th</sup>:

| Category | limits               |              |
|----------|----------------------|--------------|
|          | lower category       | upper        |
| 1        | 0.000000e+00 group.1 | 4.000000e-07 |
| 2        | 4.000000e-07 group.2 | 7.857143e-07 |
| 3        | 7.857143e-07 group.3 | 1.150000e-06 |
| 4        | 1.150000e-06 group.4 | 1.700000e-06 |
| 5        | 1.700000e-06 group.5 | 2.450000e-06 |
| 6        | 2.450000e-06 group.6 | 3.750000e-06 |
| 7        | 3.750000e-06 group.7 | 6.500000e-06 |
| 8        | 6.500000e-06 group.8 | 2.041667e-05 |

med.ex.1M - p-value = 1.8245e-07

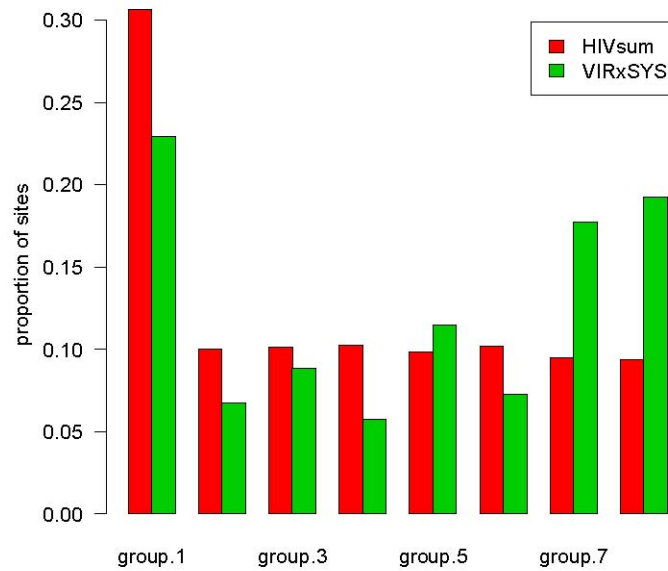

And here we count genes in the upper 1/16<sup>th</sup>:

| Category | limits                                         |
|----------|------------------------------------------------|
|          | lower category                      upper      |
| 1        | 0.000000e+00 group.1              2.500000e-07 |
| 2        | 2.500000e-07 group.2              5.000000e-07 |
| 3        | 5.000000e-07 group.3              8.666667e-07 |
| 4        | 8.666667e-07 group.4              1.000000e-06 |
| 5        | 1.000000e-06 group.5              2.000000e-06 |
| 6        | 2.000000e-06 group.6              3.000000e-06 |
| 7        | 3.000000e-06 group.7              1.239996e-05 |

high.ex.1M - p-value = 1.3168e-06

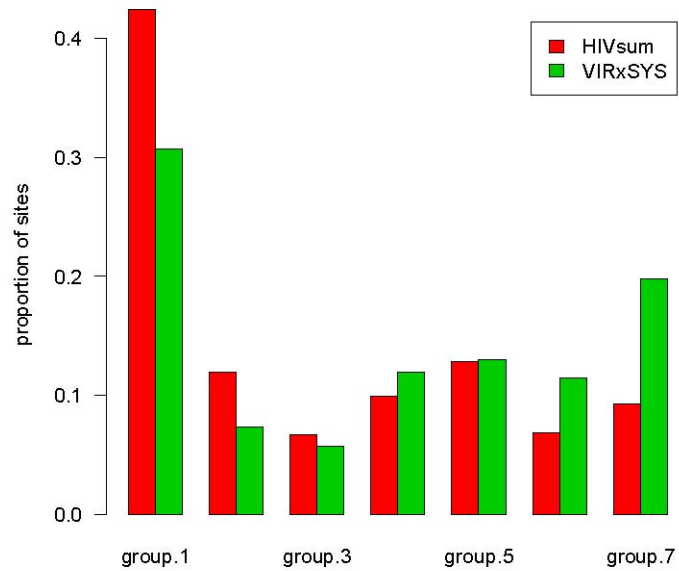

Below the effect of density of CpG islands is studied:

| Category | limits            |          |
|----------|-------------------|----------|
|          | lower category    | upper    |
| 1        | 0.00e+00 group.1  | 2.00e-06 |
| 2        | 2.00e-06 group.2  | 4.00e-06 |
| 3        | 4.00e-06 group.3  | 5.50e-06 |
| 4        | 5.50e-06 group.4  | 7.00e-06 |
| 5        | 7.00e-06 group.5  | 1.00e-05 |
| 6        | 1.00e-05 group.6  | 1.35e-05 |
| 7        | 1.35e-05 group.7  | 1.95e-05 |
| 8        | 1.95e-05 group.8  | 2.85e-05 |
| 9        | 2.85e-05 group.9  | 5.00e-05 |
| 10       | 5.00e-05 group.10 | 1.72e-04 |



dens.2M - p-value = 2.5227e-06

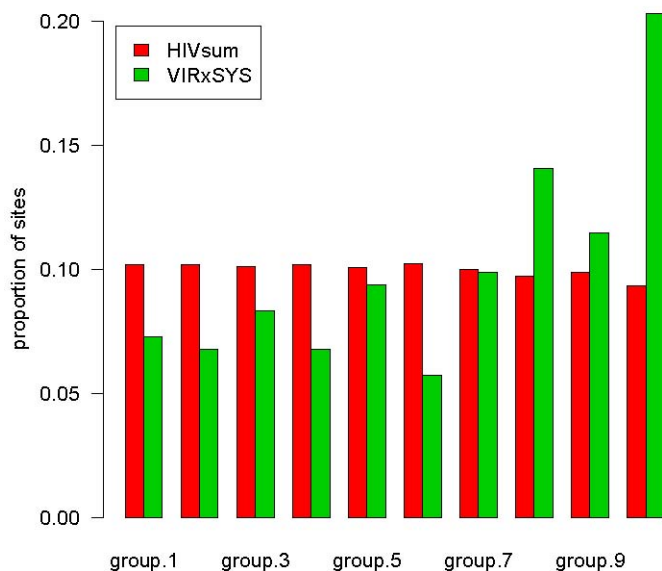

Below are the results for expression density. First, we count just genes that are in the upper half.

| Category | limits                                  |
|----------|-----------------------------------------|
|          | lower category      upper               |
| 1        | 0.000000e+00 group.1      4.047619e-07  |
| 2        | 4.047619e-07 group.2      7.666667e-07  |
| 3        | 7.666667e-07 group.3      1.166667e-06  |
| 4        | 1.166667e-06 group.4      1.666667e-06  |
| 5        | 1.666667e-06 group.5      2.366667e-06  |
| 6        | 2.366667e-06 group.6      3.308333e-06  |
| 7        | 3.308333e-06 group.7      5.083333e-06  |
| 8        | 5.083333e-06 group.8      7.258333e-06  |
| 9        | 7.258333e-06 group.9      1.046667e-05  |
| 10       | 1.046667e-05 group.10      2.487500e-05 |

low.ex.2M - p-value = 8.1066e-07

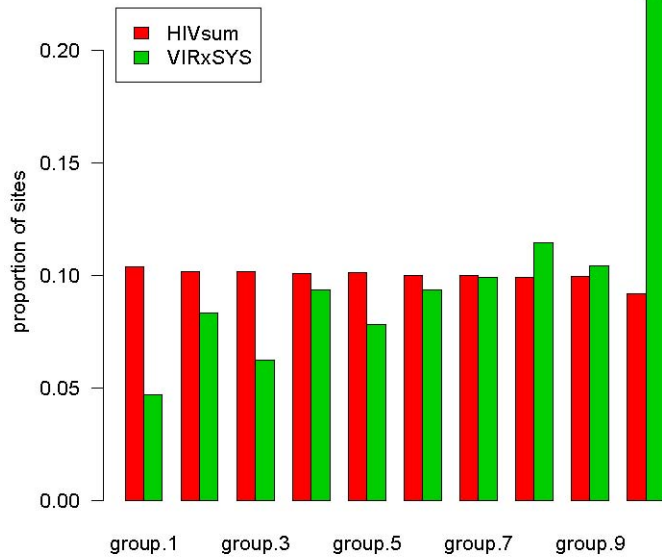

Now we count genes in the upper 1/8<sup>th</sup>:

| Category | limits               |              |
|----------|----------------------|--------------|
|          | lower category       | upper        |
| 1        | 0.000000e+00 group.1 | 2.500000e-07 |
| 2        | 2.500000e-07 group.2 | 5.000000e-07 |
| 3        | 5.000000e-07 group.3 | 7.500000e-07 |
| 4        | 7.500000e-07 group.4 | 1.125000e-06 |
| 5        | 1.125000e-06 group.5 | 1.616667e-06 |
| 6        | 1.616667e-06 group.6 | 2.408333e-06 |
| 7        | 2.408333e-06 group.7 | 3.571429e-06 |
| 8        | 3.571429e-06 group.8 | 5.489139e-06 |
| 9        | 5.489139e-06 group.9 | 1.397500e-05 |

med.ex.2M - p-value = 2.3806e-07

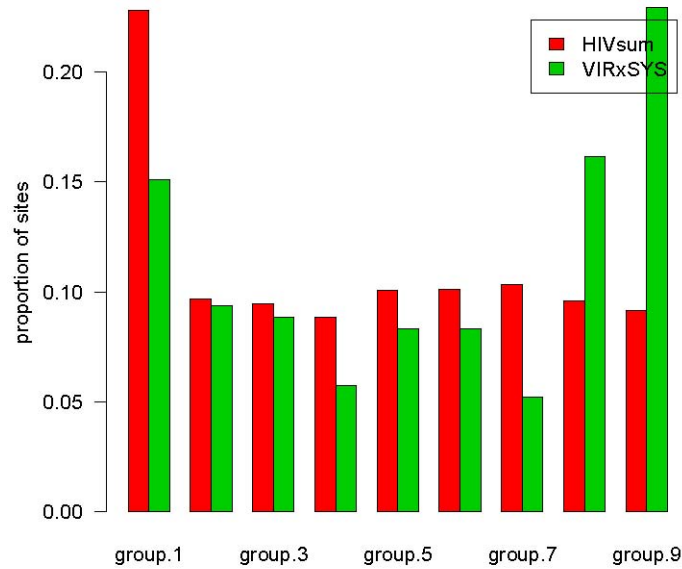

And here we count genes in the upper 1/16<sup>th</sup>:

| Category       | limits               | upper        |
|----------------|----------------------|--------------|
| lower category |                      | upper        |
| 1              | 0.000000e+00 group.1 | 1.666667e-07 |
| 2              | 1.666667e-07 group.2 | 3.333333e-07 |
| 3              | 3.333333e-07 group.3 | 5.000000e-07 |
| 4              | 5.000000e-07 group.4 | 7.500000e-07 |
| 5              | 7.500000e-07 group.5 | 1.053571e-06 |
| 6              | 1.053571e-06 group.6 | 1.666667e-06 |
| 7              | 1.666667e-06 group.7 | 2.708333e-06 |
| 8              | 2.708333e-06 group.8 | 8.959995e-06 |



high.ex.2M - p-value = 5.3834e-06

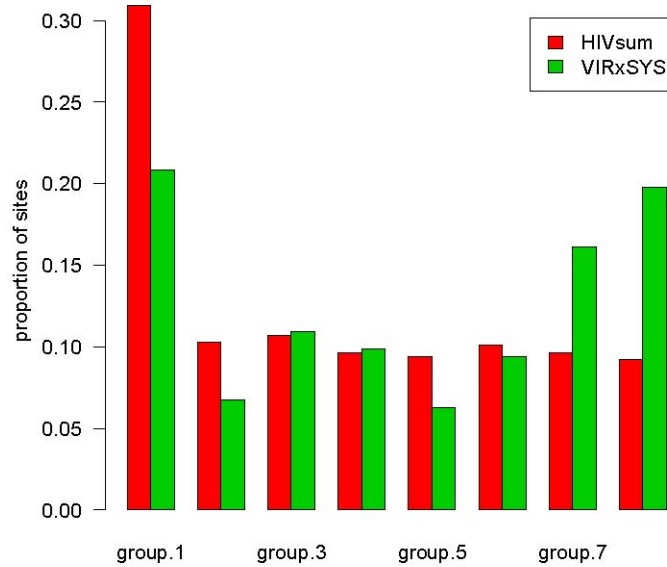

Here the effect of density of CpG islands is studied:

| Category | limits                                  |
|----------|-----------------------------------------|
|          | lower category      upper               |
| 1        | 0.000000e+00 group.1      2.500000e-06  |
| 2        | 2.500000e-06 group.2      4.000000e-06  |
| 3        | 4.000000e-06 group.3      5.250000e-06  |
| 4        | 5.250000e-06 group.4      7.000000e-06  |
| 5        | 7.000000e-06 group.5      9.250000e-06  |
| 6        | 9.250000e-06 group.6      1.325000e-05  |
| 7        | 1.325000e-05 group.7      1.875000e-05  |
| 8        | 1.875000e-05 group.8      2.625000e-05  |
| 9        | 2.625000e-05 group.9      4.701325e-05  |
| 10       | 4.701325e-05 group.10      1.515144e-04 |



dens.4M - p-value = 1.0995e-07

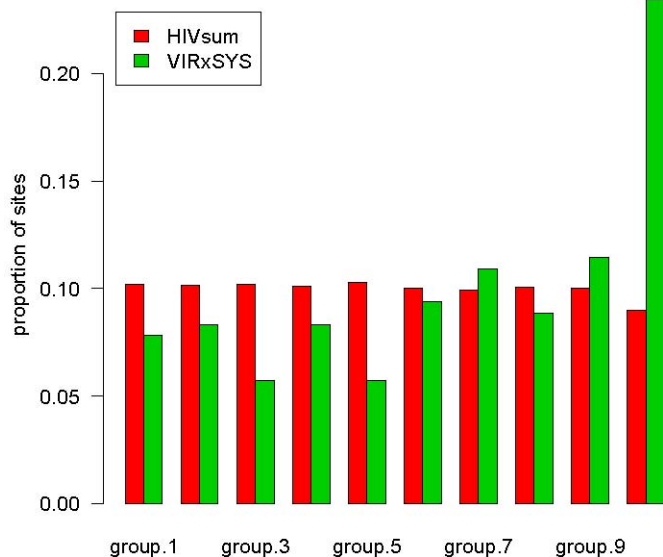

Below are the results for expression density. First, we count just genes that are in the upper half.

| Category | limits                |              |
|----------|-----------------------|--------------|
|          | lower category        | upper        |
| 1        | 0.000000e+00 group.1  | 5.000000e-07 |
| 2        | 5.000000e-07 group.2  | 8.000000e-07 |
| 3        | 8.000000e-07 group.3  | 1.133333e-06 |
| 4        | 1.133333e-06 group.4  | 1.508333e-06 |
| 5        | 1.508333e-06 group.5  | 2.041667e-06 |
| 6        | 2.041667e-06 group.6  | 3.147917e-06 |
| 7        | 3.147917e-06 group.7  | 4.815181e-06 |
| 8        | 4.815181e-06 group.8  | 6.350595e-06 |
| 9        | 6.350595e-06 group.9  | 8.741667e-06 |
| 10       | 8.741667e-06 group.10 | 2.255000e-05 |

low.ex.4M - p-value = 1.2503e-08

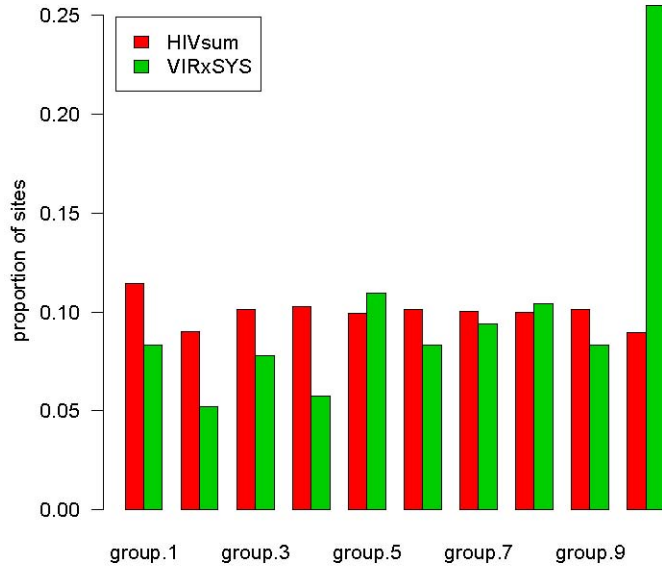

Now we count genes in the upper 1/8<sup>th</sup> :

| Category | limits                                  |
|----------|-----------------------------------------|
|          | lower category      upper               |
| 1        | 0.000000e+00 group.1      1.250000e-07  |
| 2        | 1.250000e-07 group.2      3.238095e-07  |
| 3        | 3.238095e-07 group.3      5.000000e-07  |
| 4        | 5.000000e-07 group.4      7.000000e-07  |
| 5        | 7.000000e-07 group.5      1.020833e-06  |
| 6        | 1.020833e-06 group.6      1.566667e-06  |
| 7        | 1.566667e-06 group.7      2.343148e-06  |
| 8        | 2.343148e-06 group.8      3.187500e-06  |
| 9        | 3.187500e-06 group.9      4.350000e-06  |
| 10       | 4.350000e-06 group.10      1.333750e-05 |

med.ex.4M - p-value = 2.0686e-09

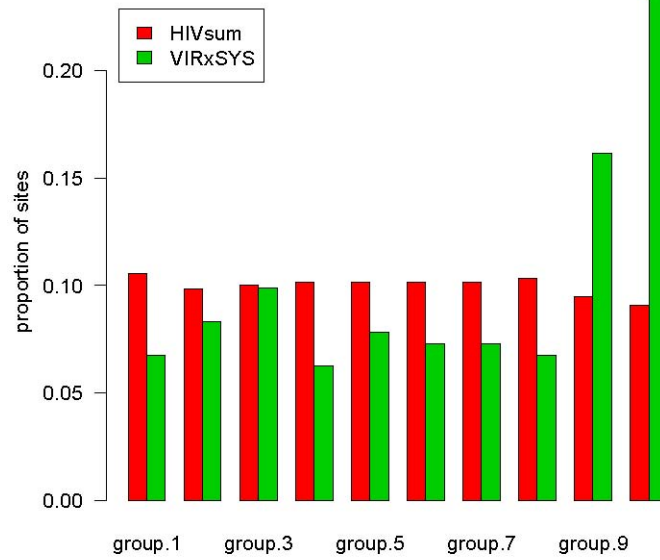

And here we count genes in the upper 1/16<sup>th</sup>:

| Category       | limits                            |
|----------------|-----------------------------------|
| lower category | upper                             |
| 1              | 0.000000e+00 group.1 1.250000e-07 |
| 2              | 1.250000e-07 group.2 2.500000e-07 |
| 3              | 2.500000e-07 group.3 3.333333e-07 |
| 4              | 3.333333e-07 group.4 5.000000e-07 |
| 5              | 5.000000e-07 group.5 7.291667e-07 |
| 6              | 7.291667e-07 group.6 1.000000e-06 |
| 7              | 1.000000e-06 group.7 1.495833e-06 |
| 8              | 1.495833e-06 group.8 2.154167e-06 |
| 9              | 2.154167e-06 group.9 8.258333e-06 |

high.ex.4M - p-value = 2.0296e-07

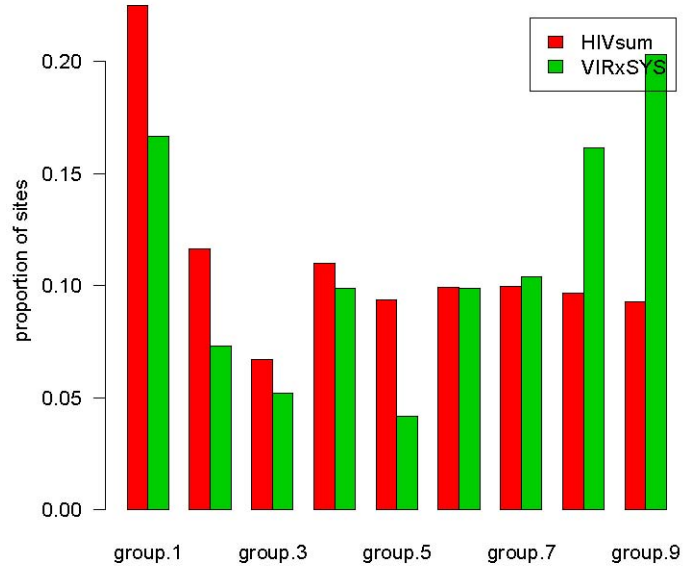

Here the effect of density of CpG islands is studied:

| Category | limits                                  |
|----------|-----------------------------------------|
|          | lower category      upper               |
| 1        | 5.000000e-07 group.1      3.000000e-06  |
| 2        | 3.000000e-06 group.2      4.000000e-06  |
| 3        | 4.000000e-06 group.3      5.250000e-06  |
| 4        | 5.250000e-06 group.4      6.875000e-06  |
| 5        | 6.875000e-06 group.5      9.250000e-06  |
| 6        | 9.250000e-06 group.6      1.225000e-05  |
| 7        | 1.225000e-05 group.7      1.687500e-05  |
| 8        | 1.687500e-05 group.8      2.387500e-05  |
| 9        | 2.387500e-05 group.9 4      .246248e-05 |
| 10       | 4.246248e-05 group.10      1.268003e-04 |



dens.8M - p-value = 3.098e-08

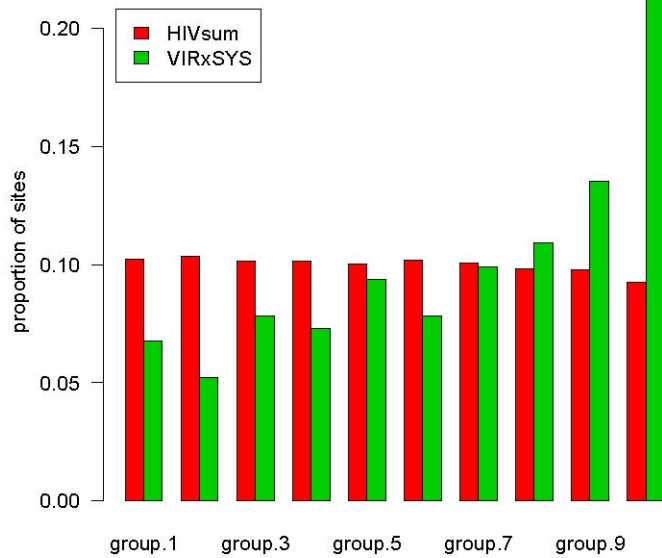

Here are the results for expression density. First, we count just genes that are in the upper half.

| Category | limits                |              |
|----------|-----------------------|--------------|
|          | lower category        | upper        |
| 1        | 0.000000e+00 group.1  | 5.708333e-07 |
| 2        | 5.708333e-07 group.2  | 8.385417e-07 |
| 3        | 8.385417e-07 group.3  | 1.140972e-06 |
| 4        | 1.140972e-06 group.4  | 1.433333e-06 |
| 5        | 1.433333e-06 group.5  | 2.064205e-06 |
| 6        | 2.064205e-06 group.6  | 2.976190e-06 |
| 7        | 2.976190e-06 group.7  | 4.018899e-06 |
| 8        | 4.018899e-06 group.8  | 5.522917e-06 |
| 9        | 5.522917e-06 group.9  | 7.635913e-06 |
| 10       | 7.635913e-06 group.10 | 1.508542e-05 |



low.ex.8M - p-value = 2.1467e-09

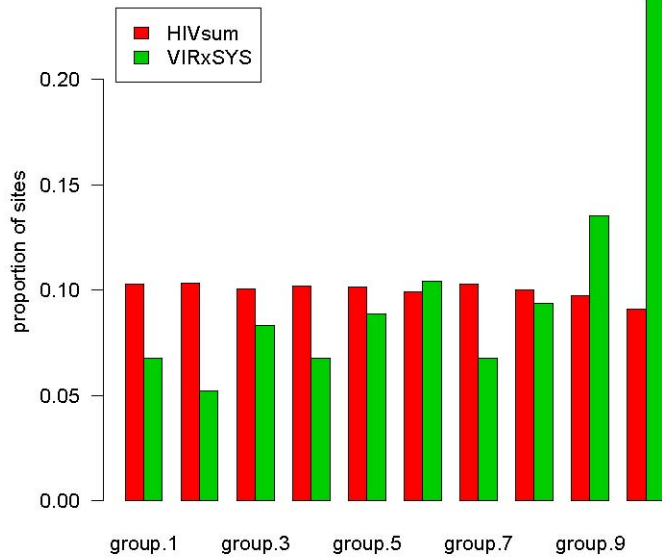

Now we count genes in the upper 1/8<sup>th</sup>:

| Category       | limits                | upper        |
|----------------|-----------------------|--------------|
| lower category |                       |              |
| 1              | 0.000000e+00 group.1  | 2.291667e-07 |
| 2              | 2.291667e-07 group.2  | 3.645833e-07 |
| 3              | 3.645833e-07 group.3  | 5.000000e-07 |
| 4              | 5.000000e-07 group.4  | 7.083333e-07 |
| 5              | 7.083333e-07 group.5  | 9.812500e-07 |
| 6              | 9.812500e-07 group.6  | 1.435417e-06 |
| 7              | 1.435417e-06 group.7  | 1.947917e-06 |
| 8              | 1.947917e-06 group.8  | 2.870833e-06 |
| 9              | 2.870833e-06 group.9  | 3.580745e-06 |
| 10             | 3.580745e-06 group.10 | 8.177083e-06 |

med.ex.8M - p-value = 7.2135e-10

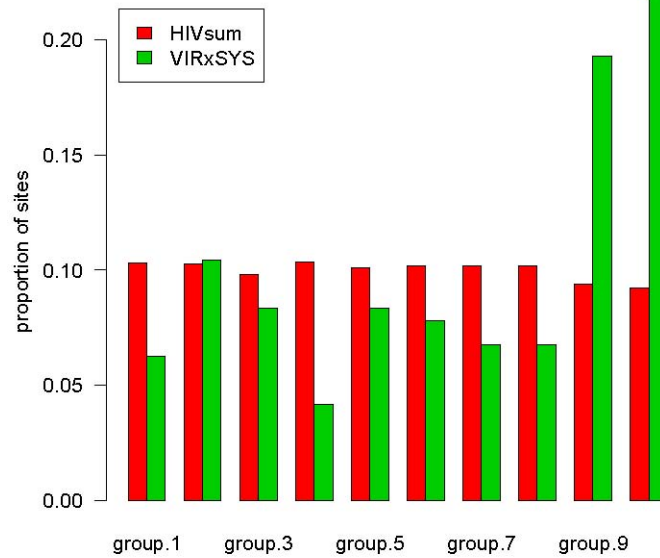

And here we count genes in the upper 1/16<sup>th</sup>:

| Category | limits                |              |
|----------|-----------------------|--------------|
|          | lower category        | upper        |
| 1        | 0.000000e+00 group.1  | 8.035714e-08 |
| 2        | 8.035714e-08 group.2  | 1.666667e-07 |
| 3        | 1.666667e-07 group.3  | 2.395833e-07 |
| 4        | 2.395833e-07 group.4  | 3.520833e-07 |
| 5        | 3.520833e-07 group.5  | 4.791667e-07 |
| 6        | 4.791667e-07 group.6  | 6.562500e-07 |
| 7        | 6.562500e-07 group.7  | 9.134815e-07 |
| 8        | 9.134815e-07 group.8  | 1.278769e-06 |
| 9        | 1.278769e-06 group.9  | 1.760417e-06 |
| 10       | 1.760417e-06 group.10 | 5.283333e-06 |

high.ex.8M - p-value = 2.4877e-09

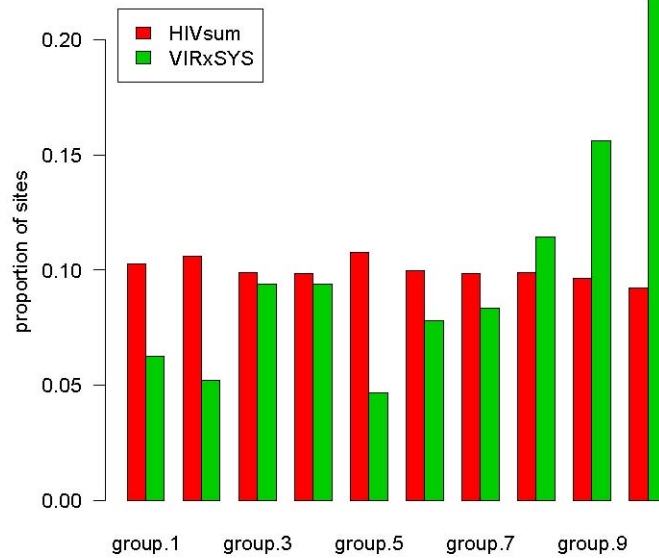

Here the effect of density of CpG islands is studied:

| Category | limits                |              |
|----------|-----------------------|--------------|
|          | lower category        | upper        |
| 1        | 7.500000e-07 group.1  | 3.312500e-06 |
| 2        | 3.312500e-06 group.2  | 4.250000e-06 |
| 3        | 4.250000e-06 group.3  | 5.437500e-06 |
| 4        | 5.437500e-06 group.4  | 7.187500e-06 |
| 5        | 7.187500e-06 group.5  | 9.125000e-06 |
| 6        | 9.125000e-06 group.6  | 1.125000e-05 |
| 7        | 1.125000e-05 group.7  | 1.518750e-05 |
| 8        | 1.518750e-05 group.8  | 2.126807e-05 |
| 9        | 2.126807e-05 group.9  | 3.226199e-05 |
| 10       | 3.226199e-05 group.10 | 9.244836e-05 |



dens.16M - p-value = 8.736e-07

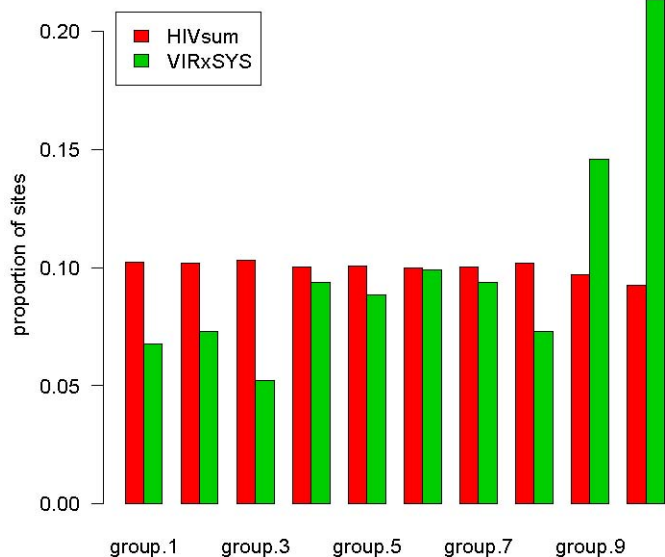

Below are the results for expression density. First, we count just genes that are in the upper half.

| Category | limits                |              |
|----------|-----------------------|--------------|
|          | lower category        | upper        |
| 1        | 9.375000e-08 group.1  | 6.728175e-07 |
| 2        | 6.728175e-07 group.2  | 8.936508e-07 |
| 3        | 8.936508e-07 group.3  | 1.187500e-06 |
| 4        | 1.187500e-06 group.4  | 1.487054e-06 |
| 5        | 1.487054e-06 group.5  | 2.017113e-06 |
| 6        | 2.017113e-06 group.6  | 2.636161e-06 |
| 7        | 2.636161e-06 group.7  | 3.344345e-06 |
| 8        | 3.344345e-06 group.8  | 4.626190e-06 |
| 9        | 4.626190e-06 group.9  | 6.207258e-06 |
| 10       | 6.207258e-06 group.10 | 9.449033e-06 |

low.ex.16M - p-value = 2.0342e-07

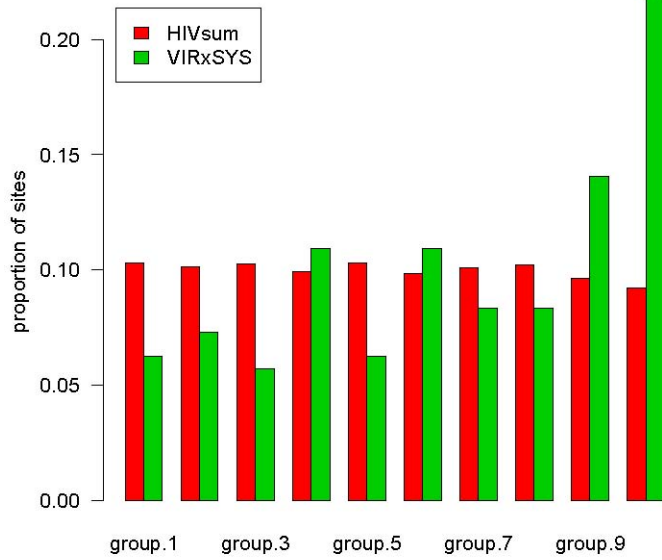

Now we count genes in the upper 1/8<sup>th</sup>:

| Category | limits                |              |
|----------|-----------------------|--------------|
|          | lower category        | upper        |
| 1        | 6.944444e-09 group.1  | 2.520833e-07 |
| 2        | 2.520833e-07 group.2  | 3.866071e-07 |
| 3        | 3.866071e-07 group.3  | 5.302083e-07 |
| 4        | 5.302083e-07 group.4  | 7.235119e-07 |
| 5        | 7.235119e-07 group.5  | 1.016121e-06 |
| 6        | 1.016121e-06 group.6  | 1.269494e-06 |
| 7        | 1.269494e-06 group.7  | 1.676562e-06 |
| 8        | 1.676562e-06 group.8  | 2.278720e-06 |
| 9        | 2.278720e-06 group.9  | 2.956250e-06 |
| 10       | 2.956250e-06 group.10 | 4.935491e-06 |

med.ex.16M - p-value = 2.7057e-07

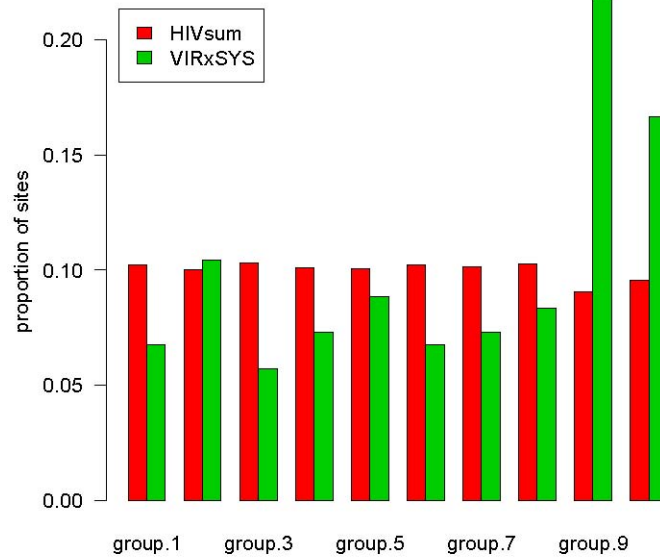

And here we count genes in the upper 1/16<sup>th</sup> :

| Category | limits                                  |
|----------|-----------------------------------------|
|          | lower category      upper               |
| 1        | 0.000000e+00 group.1      1.145833e-07  |
| 2        | 1.145833e-07 group.2      1.875000e-07  |
| 3        | 1.875000e-07 group.3      2.635417e-07  |
| 4        | 2.635417e-07 group.4      3.593750e-07  |
| 5        | 3.593750e-07 group.5      4.699405e-07  |
| 6        | 4.699405e-07 group.6      5.875000e-07  |
| 7        | 5.875000e-07 group.7      7.602310e-07  |
| 8        | 7.602310e-07 group.8      1.063616e-06  |
| 9        | 1.063616e-06 group.9      1.427083e-06  |
| 10       | 1.427083e-06 group.10      3.197396e-06 |







dens.32M - p-value = 7.9686e-05

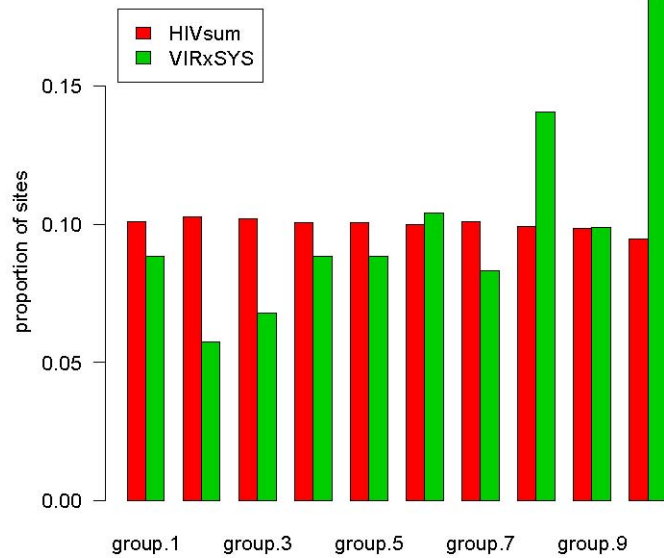

Here are the results for expression density. First, we count just genes that are in the upper half.

| Category | limits                |              |
|----------|-----------------------|--------------|
|          | lower category        | upper        |
| 1        | 2.440476e-07 group.1  | 8.057292e-07 |
| 2        | 8.057292e-07 group.2  | 1.025521e-06 |
| 3        | 1.025521e-06 group.3  | 1.261235e-06 |
| 4        | 1.261235e-06 group.4  | 1.615201e-06 |
| 5        | 1.615201e-06 group.5  | 1.920337e-06 |
| 6        | 1.920337e-06 group.6  | 2.323990e-06 |
| 7        | 2.323990e-06 group.7  | 3.006076e-06 |
| 8        | 3.006076e-06 group.8  | 3.946391e-06 |
| 9        | 3.946391e-06 group.9  | 4.559812e-06 |
| 10       | 4.559812e-06 group.10 | 9.250907e-06 |

low.ex.32M - p-value = 6.4862e-05

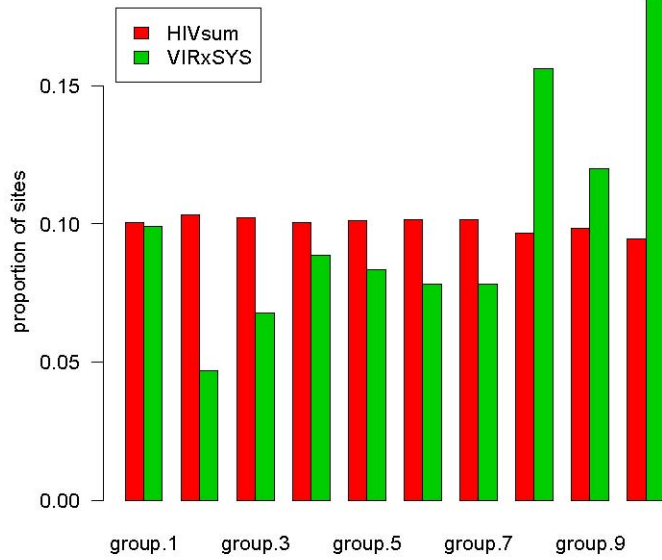

Now we count genes in the upper 1/8<sup>th</sup> :

| Category | limits                                   |
|----------|------------------------------------------|
|          | lower category      upper                |
| 1        | 9.173908e-08 group.1      3.326761e-07   |
| 2        | 3.326761e-07 group.2      4.633185e-07   |
| 3        | 4.633185e-07 group.3      5.906250e-07   |
| 4        | 5.906250e-07 group.4      7.760087e-07   |
| 5        | 7.760087e-07 group.5      9.290179e-07   |
| 6        | 9.290179e-07 group.6      1.147917e-06   |
| 7        | 1.147917e-06 group.7      1.535038e-06   |
| 8        | 1.535038e-06 group.8      1.859747e-06   |
| 9        | 1.859747e-06 group.9      2.364062e-06   |
| 10       | 2.364062e-06 group.10 4.      710958e-06 |

med.ex.32M - p-value = 6.2162e-05

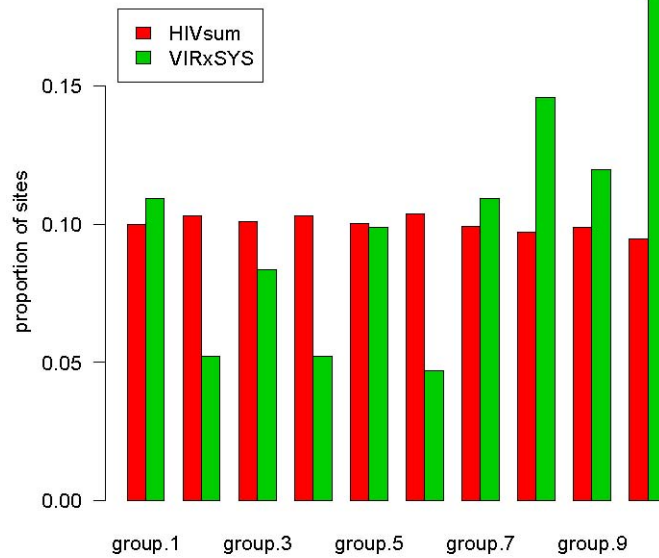

And here we count genes in the upper 1/16<sup>th</sup> :

| Category | limits                                  |
|----------|-----------------------------------------|
|          | lower category      upper               |
| 1        | 1.896911e-08 group.1      1.598958e-07  |
| 2        | 1.598958e-07 group.2      2.213542e-07  |
| 3        | 2.213542e-07 group.3      2.904211e-07  |
| 4        | 2.904211e-07 group.4      3.878653e-07  |
| 5        | 3.878653e-07 group.5      4.654018e-07  |
| 6        | 4.654018e-07 group.6      5.791667e-07  |
| 7        | 5.791667e-07 group.7      7.002796e-07  |
| 8        | 7.002796e-07 group.8      8.462893e-07  |
| 9        | 8.462893e-07 group.9      1.235322e-06  |
| 10       | 1.235322e-06 group.10      2.499212e-06 |

high.ex.32M - p-value = 0.00012204

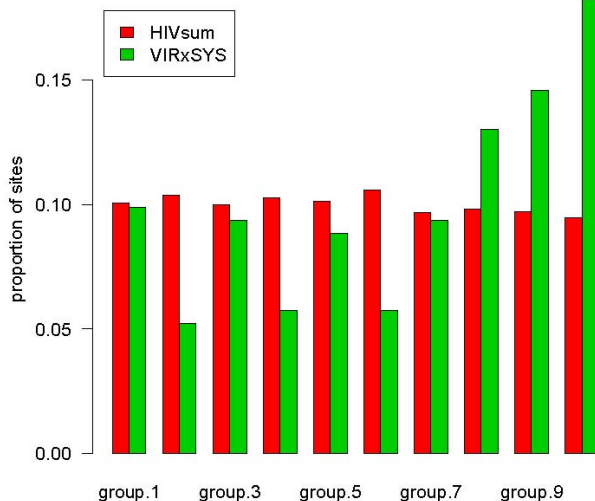

Here the effect of density of CpG islands is studied:

| Category | limits                |              |
|----------|-----------------------|--------------|
|          | lower category        | upper        |
| 1        | 2.671875e-06 group.1  | 4.468516e-06 |
| 2        | 4.468516e-06 group.2  | 5.609375e-06 |
| 3        | 5.609375e-06 group.3  | 6.468750e-06 |
| 4        | 6.468750e-06 group.4  | 7.296875e-06 |
| 5        | 7.296875e-06 group.5  | 8.266942e-06 |
| 6        | 8.266942e-06 group.6  | 1.000252e-05 |
| 7        | 1.000252e-05 group.7  | 1.227835e-05 |
| 8        | 1.227835e-05 group.8  | 1.594645e-05 |
| 9        | 1.594645e-05 group.9  | 2.066955e-05 |
| 10       | 2.066955e-05 group.10 | 4.072442e-05 |

cpg.dens.32M - p-value = 0.10271

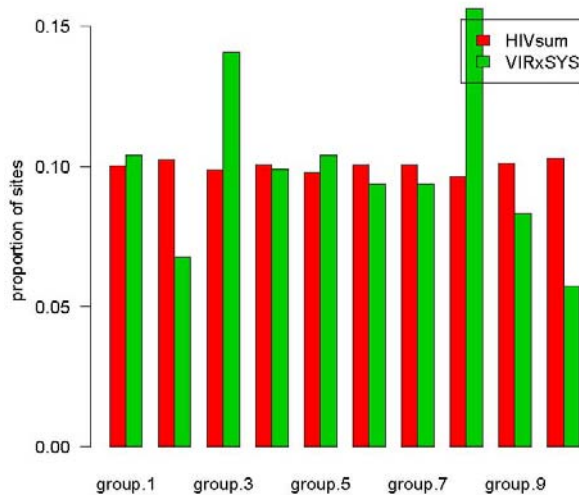

## 5 Juxtaposition with Gene Start and End Positions

### 5.1 Acembly Annotations

In this section we study the effect of juxtaposition in terms of gene start and end positions. The first barplot shows the effect of gene width for those insertions that are located within an Acembly gene.

| Category | limits         |          |           |
|----------|----------------|----------|-----------|
|          | lower category | group    | upper     |
| 1        | 357.0          | group.1  | 14301.5   |
| 2        | 14301.5        | group.2  | 24460.0   |
| 3        | 24460.0        | group.3  | 35436.0   |
| 4        | 35436.0        | group.4  | 48532.0   |
| 5        | 48532.0        | group.5  | 64500.0   |
| 6        | 64500.0        | group.6  | 84305.0   |
| 7        | 84305.0        | group.7  | 109498.0  |
| 8        | 109498.0       | group.8  | 149730.0  |
| 9        | 149730.0       | group.9  | 230286.5  |
| 10       | 230286.5       | group.10 | 1529446.0 |

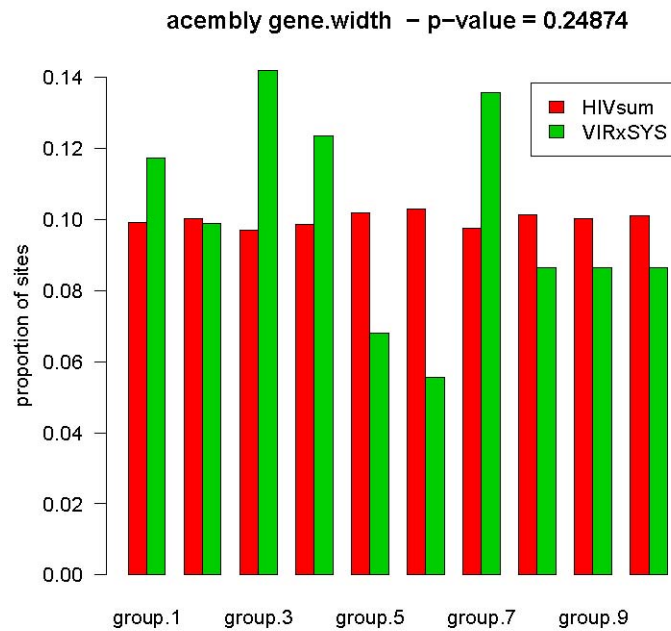

The next plot uses the width of a non-gene region for insertions that fall into such regions.

| Category | limits            |          |
|----------|-------------------|----------|
|          | lower category    | upper    |
| 1        | 288.0 group.1     | 8670.0   |
| 2        | 8670.0 group.2    | 15495.0  |
| 3        | 15495.0 group.3   | 24554.0  |
| 4        | 24554.0 group.4   | 38135.0  |
| 5        | 38135.0 group.5   | 58338.5  |
| 6        | 58338.5 group.6   | 79834.2  |
| 7        | 79834.2 group.7   | 119887.2 |
| 8        | 119887.2 group.8  | 176510.4 |
| 9        | 176510.4 group.9  | 333186.5 |
| 10       | 333186.5 group.10 | 833936.0 |

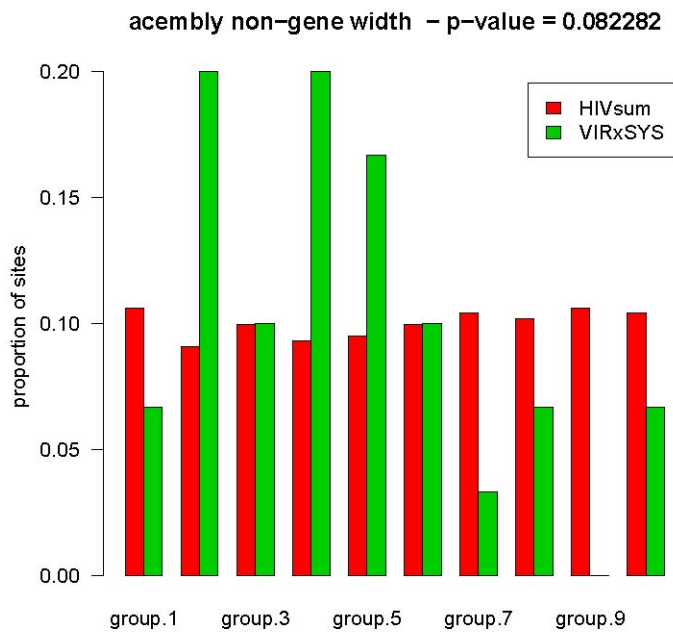

The next plot studies the distance to the nearest boundary between a gene and a non-gene region. The distance is expressed as a fraction of the length of the region. Thus, '0.25' refers to one quarter of the distance from the site to nearest boundary divided by the total width of the region.

| Category | limits                |            |
|----------|-----------------------|------------|
|          | lower category        | upper      |
| 1        | 5.665043e-05 group.1  | 0.05446415 |
| 2        | 5.446415e-02 group.2  | 0.10687480 |
| 3        | 1.068748e-01 group.3  | 0.16139174 |
| 4        | 1.613917e-01 group.4  | 0.21251964 |
| 5        | 2.125196e-01 group.5  | 0.25635738 |
| 6        | 2.563574e-01 group.6  | 0.30151305 |
| 7        | 3.015131e-01 group.7  | 0.35040906 |
| 8        | 3.504091e-01 group.8  | 0.40200305 |
| 9        | 4.020031e-01 group.9  | 0.45061212 |
| 10       | 4.506121e-01 group.10 | 0.49967076 |

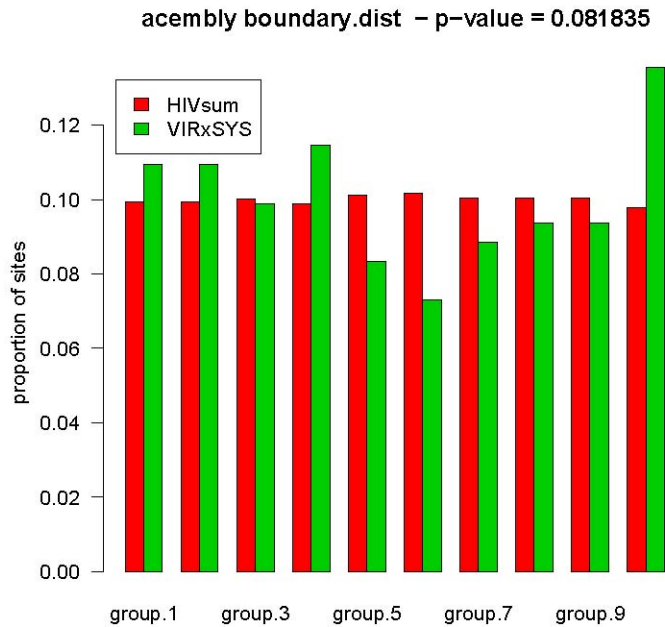



This plot studies the effect of nearness to the beginning of a transcript. For sites in genes, it is the distance to the start of the gene divided by the width of the gene. For other sites it is the distance from the site to the nearer gene if that gene boundary is also a transcription starting point. Locations near '0' are relatively near the beginning of transcription, while those near '1' are near the termination of the transcript.

| Category | limits                |            |
|----------|-----------------------|------------|
|          | lower category        | upper      |
| 1        | 0.0009344262 group.1  | 0.09771473 |
| 2        | 0.0977147279 group.2  | 0.18896134 |
| 3        | 0.1889613398 group.3  | 0.27139459 |
| 4        | 0.2713945891 group.4  | 0.35206577 |
| 5        | 0.3520657743 group.5  | 0.44295463 |
| 6        | 0.4429546271 group.6  | 0.54284215 |
| 7        | 0.5428421477 group.7  | 0.64988290 |
| 8        | 0.6498828987 group.8  | 0.75860630 |
| 9        | 0.7586062998 group.9  | 0.87600479 |
| 10       | 0.8760047932 group.10 | 0.99994335 |

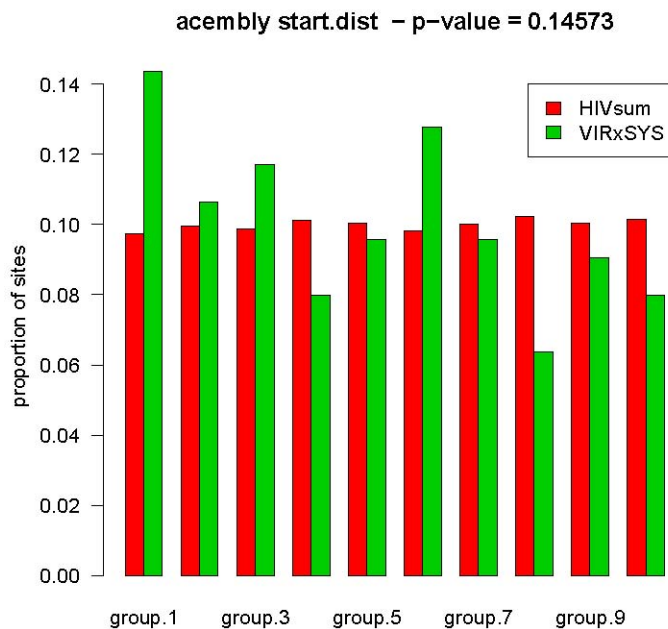

## 5.2 RefSeq Annotations

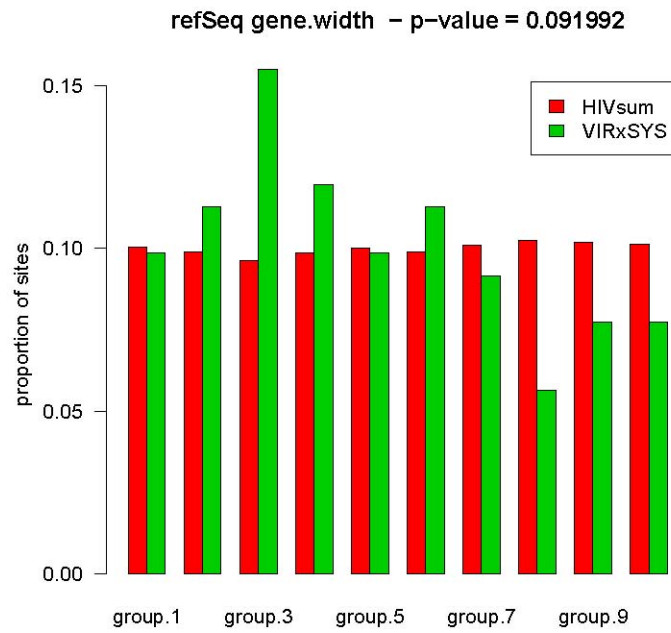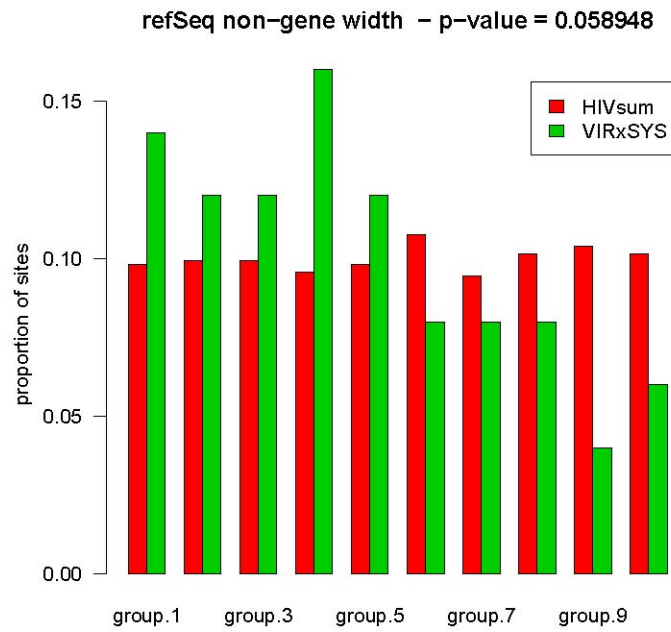

refSeq boundary.dist - p-value = 0.13534

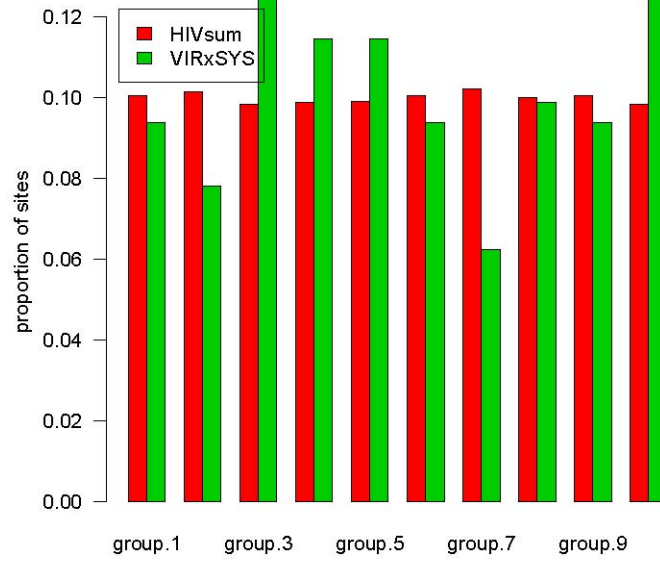

refSeq start.dist - p-value = 0.7911

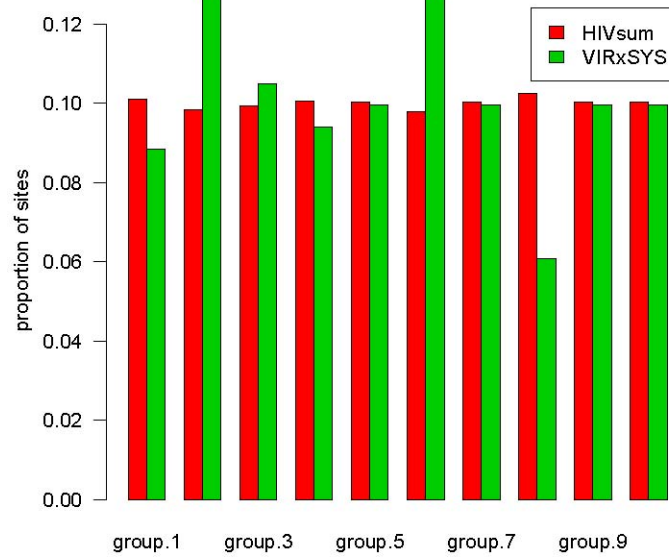

### 5.3 genScan Annotations

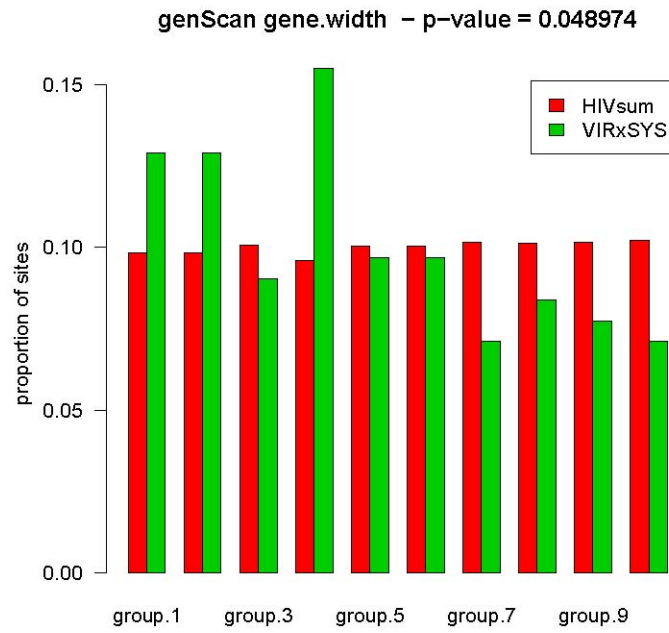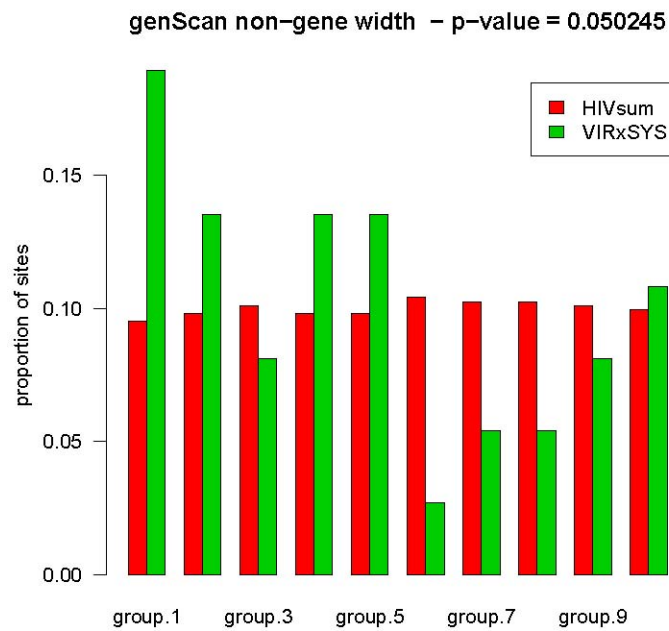

genScan boundary.dist - p-value = 0.32639

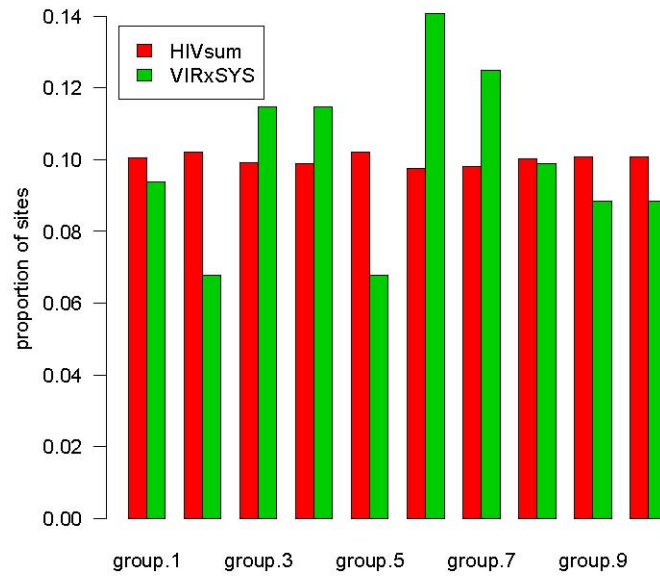

genScan start.dist - p-value = 0.96653

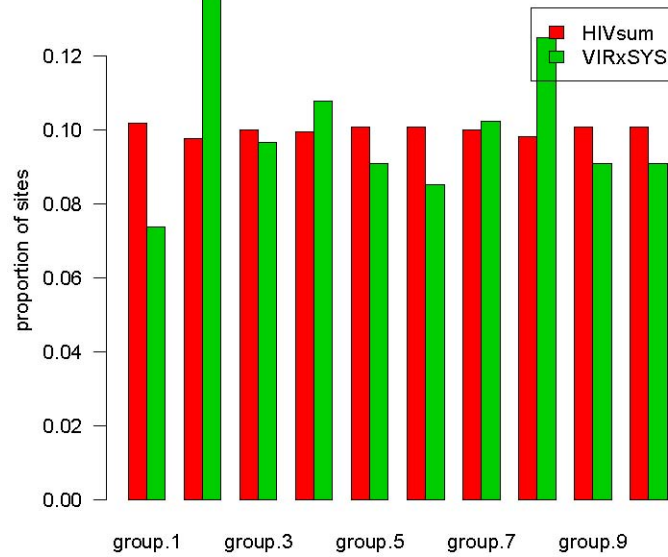

## 5.4 uniGene Annotations

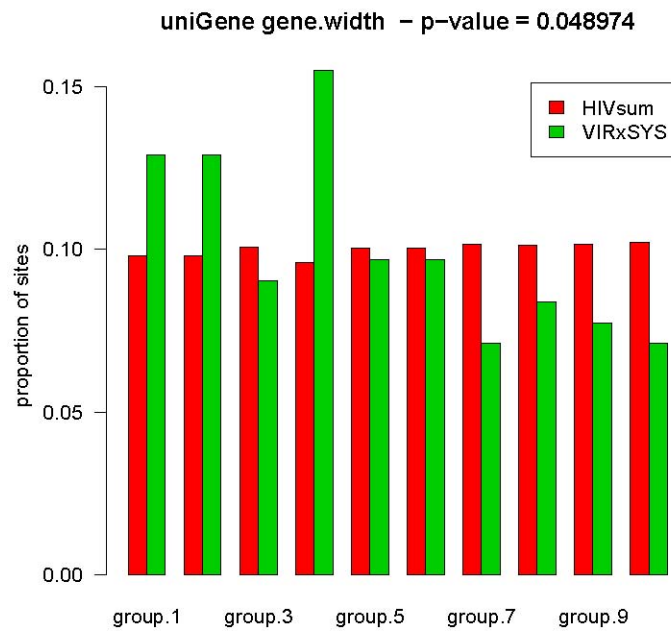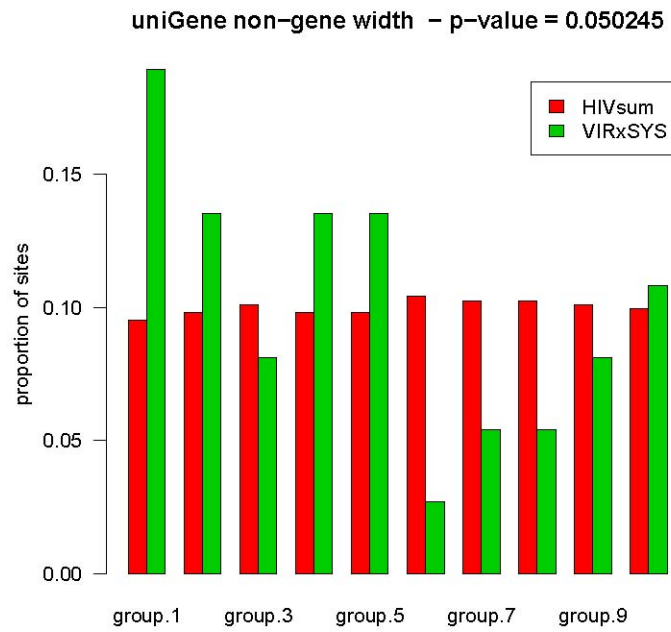

uniGene boundary.dist - p-value = 0.32639



uniGene start.dist - p-value = 0.96653



## 6 GC content

Here we study the effect of GC content on insertion. The GC content is taken from the Human Genome Draft at GoldenPath from the table <http://genome.ucsc.edu/goldenPath/hg17/database/gc5Base.txt.gz>.

Following the plot is a table of fitted coefficients based on splitting the GC percent data at the median.

| Category | limits            |          |
|----------|-------------------|----------|
|          | lower category    | upper    |
| 1        | 26.26953 group.1  | 33.86719 |
| 2        | 33.86719 group.2  | 35.44922 |
| 3        | 35.44922 group.3  | 36.73828 |
| 4        | 36.73828 group.4  | 38.06641 |
| 5        | 38.06641 group.5  | 39.33594 |
| 6        | 39.33594 group.6  | 40.76172 |
| 7        | 40.76172 group.7  | 42.50000 |
| 8        | 42.50000 group.8  | 44.72656 |
| 9        | 44.72656 group.9  | 48.69141 |
| 10       | 48.69141 group.10 | 66.44531 |

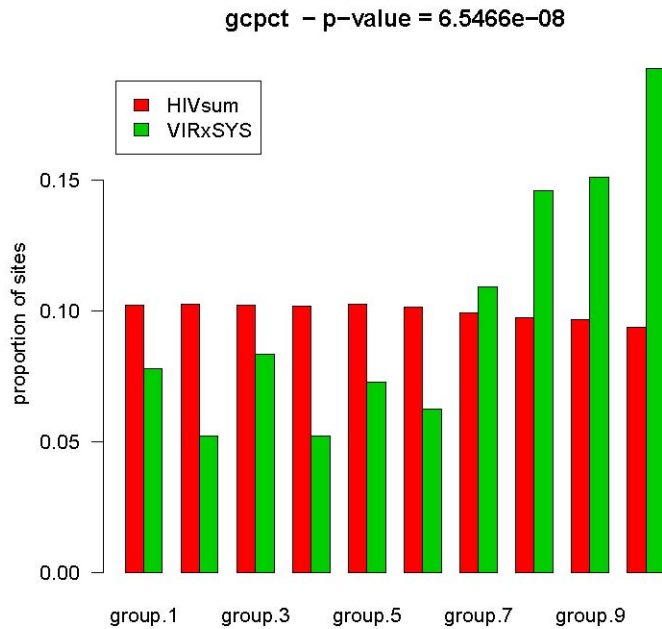



## 7 Cytobands

Here we study the association of cytoband with insertion intensity. The data are obtained from

<http://genome.ucsc.edu/goldenPath/hg17/database/cytoBand.txt.gz>.

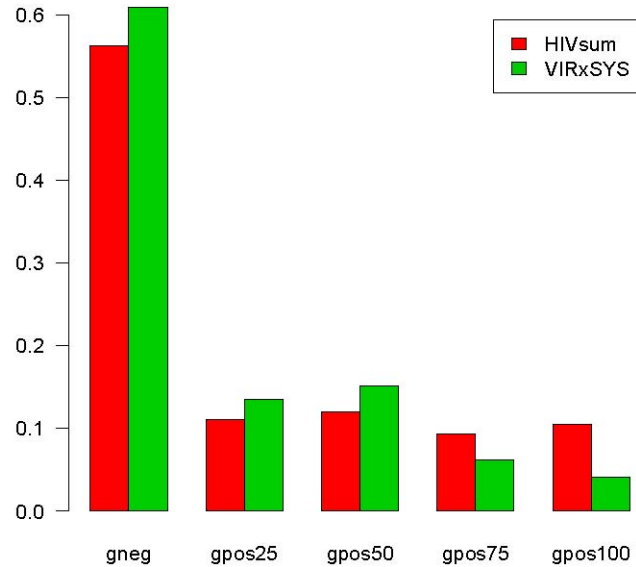

A formal test of significance attains a p-value of 0.007.

## Supporting References

1. MacGregor, R. R. (2001) *Hum. Gene Ther* **12**, 2028-2029.
2. Levine, B. L., Mosca, J., Riley, J. L., Carroll, R. G., Vahey, M. T., Jagodzinski, L., Wagner, K. F., Mayers, D. L., Burke, D. S., Weislow, O. S. *et al.* (1996) *Science* **272**, 1939-1943.
3. Levine, B. L., Bernstein, W., Craighead, N., Lindsten, T., Thompson, C. B. & June, C. H. (1997) *J Immunol* **159**, 5921-5930.
4. Hanenberg, H., Xiao, X. L., Dilloo, D., Hashino, K., Kato, I. & Williams, D. A. (1996) *Nat. Med* **2**, 876-882.
5. Pollok, K. E., Hanenberg, H., Noblitt, T. W., Schroeder, W. L., Kato, I., Emanuel, D. & Williams, D. A. (1998) *J Virol.* **72**, 4882-4892.
6. Levine, B. L., Cotte, J., Small, C. C., Carroll, R. G., Riley, J. L., Bernstein, W. B., Van Epps, D., Hardwick, R. A. & June, C. H. (1998) *J. Hematotherapy* **7**, 437-448.
7. Manilla, P., Rebello, T., Afable, C., Lu, X., Slepushkin, V., Humeau, L. M., Schonely, K., Ni, Y., Binder, G. K., Levine, B. L. *et al.* (2005) *Hum. Gene Ther* **16**, 17-25.
8. Schonely, K., Afable C, Slepushkin V, Lu X, Andre K, Boehmer J, Bengston K, Doub M, Cohen R, Berlinger D *et al.* (2003) *Bioprocessing Journal* **2**, 39-47.
9. Akatsuka, Y., Martin, E. G., Madonik, A., Barsoukov, A. A. & Hansen, J. A. (1999) *Tissue Antigens.* **53**, 122-134.
10. Schroder, A. R., Shinn, P., Chen, H., Berry, C., Ecker, J. R. & Bushman, F. (2002) *Cell* **110**, 521-529.
11. Wu, X., Li, Y., Crise, B. & Burgess, S. M. (2003) *Science.* **300**, 1749-1751.
12. Lewinski, M. K., Bisgrove, D., Shinn, P., Chen, H., Hoffmann, C., Hannenhalli, S., Verdin, E., Berry, C. C., Ecker, J. R. & Bushman, F. D. (2005) *J Virol.* **79**, 6610-6619.
13. Su, A. I., Wiltshire, T., Batalov, S., Lapp, H., Ching, K. A., Block, D., Zhang, J., Soden, R., Hayakawa, M., Kreiman, G. *et al.* (2004) *Proc. Natl. Acad. Sci. U. S. A.* **101**, 6062-6067.
14. McCullagh P & Nelder JA (1999) in *Generalized linear models* (Chapman & Hall, Ltd).
