# Supplementary material
Source: PubMed Central journal article supplement (PMC1859936)

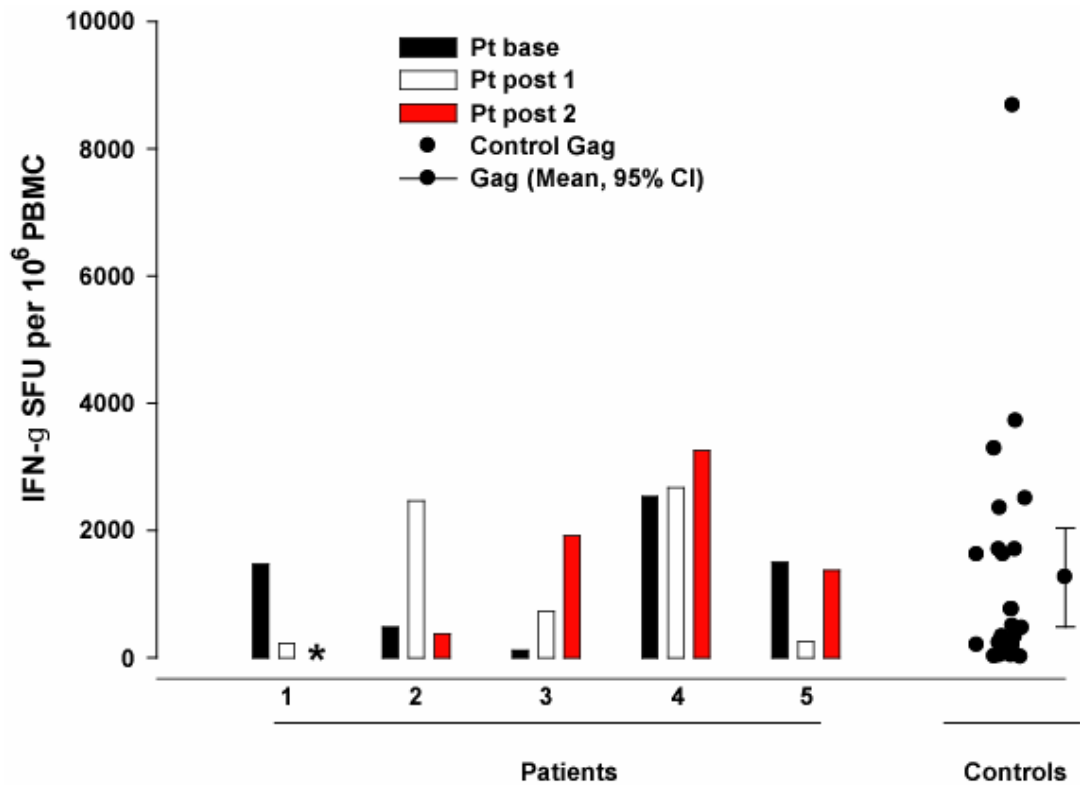

Supplement: pnas_0608138103_3.pdf [file pnas_0608138103_3.pdf]

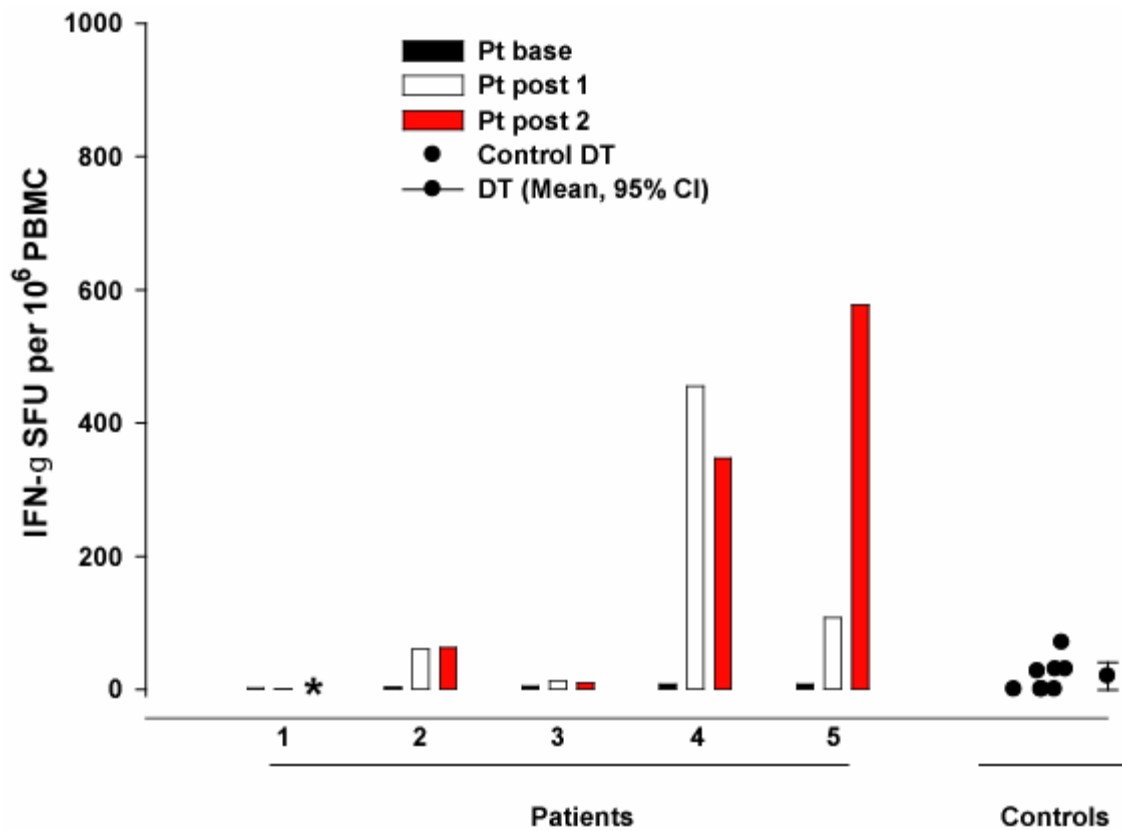

Supplement: pnas_0608138103_4.pdf [file pnas_0608138103_4.pdf]

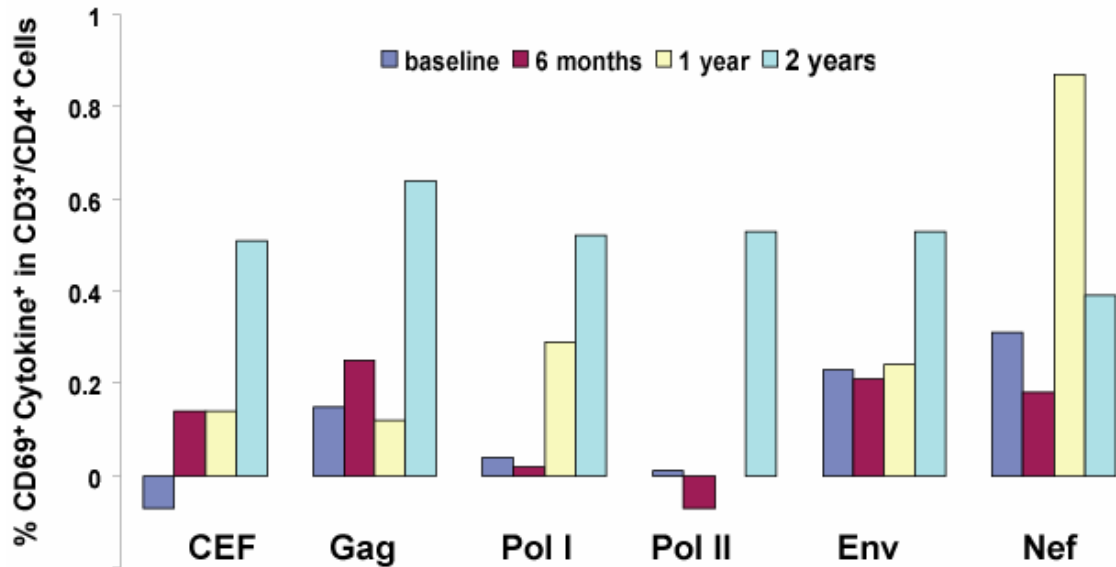

Supplement: pnas_0608138103_5.pdf [file pnas_0608138103_5.pdf]
